# Supplementary material for: Primate segmental duplication creates novel promoters for theLRRC37gene family within the 17q21.31 inversion polymorphism region
Source: HighWire-hosted journal article supplement (doi:10.1101/gr.134098.111), 2012-03-14
Supplement: Supplementary_Table_1.xlsx [file Supplementary_Table_1.xlsx]

## Sheet: H1.txt
SW score	Perc div.	Perc del.	Perc ins.	Qry sequence	Qry Position Begin	Qry Position End	Qry Position repeat (left)		Matching repeat	Repeat class/family	Subj Position Begin	Subj Position End	Subj Position repeat (left)	ID
990	6.1	0	3.4	H1	7820	7972	-1161273	+	SD4689|chr17:40848076-40860828|q21.31	Unknown	160	307	-11224	1
1912	27.6	0	0.2	H1	7974	8554	-1160691	+	SD4689|chr17:40848076-40860828|q21.31	Unknown	756	1335	-10196	2
7407	25.1	0	1.9	H1	10791	12096	-1157149	+	SD4689|chr17:40848076-40860828|q21.31	Unknown	2344	3624	-7907	3
2993	9.8	0	0.7	H1	12947	13406	-1155839	+	SD4689|chr17:40848076-40860828|q21.31	Unknown	4467	4923	-6608	4
3501	38.7	0	1.1	H1	13705	14533	-1154712	+	SD4689|chr17:40848076-40860828|q21.31	Unknown	4916	5735	-5796	5
7787	34.9	0	1.3	H1	16022	17624	-1151621	+	SD4689|chr17:40848076-40860828|q21.31	Unknown	7214	8796	-2735	6
2186	5.6	0	5.6	H1	17559	17915	-1151330	+	SD4689|chr17:40848076-40860828|q21.31	Unknown	8731	9068	-2463	7	*
16695	12.9	0	0.2	H1	17941	20375	-1148870	+	SD4689|chr17:40848076-40860828|q21.31	Unknown	9064	11493	-38	8
822	42	6.5	3.1	H1	20313	20681	-1148564	+	SD2041|NA:0-0|NA	Unknown	2090	2470	-905	9	*
2576	16.4	0.5	3.2	H1	20471	20918	-1148327	+	SD4687|chr17:40860831-40861335|q21.31	Unknown	73	508	-2	10
4534	50.5	0.2	0.6	H1	20921	22338	-1146907	+	SD5741|chr17:40861335-40866975|q21.31	Unknown	2	1413	-4023	11
7750	18.8	0.3	3	H1	22356	23823	-1145422	+	SD5741|chr17:40861335-40866975|q21.31	Unknown	1400	2829	-2607	12	*
8384	10.4	1.4	3.7	H1	23746	25255	-1143990	+	SD5741|chr17:40861335-40866975|q21.31	Unknown	2751	4227	-1209	13	*
10102	8.5	0.7	1.6	H1	24764	26321	-1142924	+	SD5741|chr17:40861335-40866975|q21.31	Unknown	3740	5283	-153	14
1317	4	1.1	1.1	H1	26382	26560	-1142685	+	SD5741|chr17:40861335-40866975|q21.31	Unknown	5258	5436	0	15
365	3.6	0	1.8	H1	26904	26959	-1142286	+	SD5740|chr17:40867319-40867750|q21.31	Unknown	1	55	-381	16
2674	27.5	0	6.8	H1	27477	28042	-1141203	+	SD5738|NA:0-0|NA	Unknown	143	672	0	17
14950	2.5	0	1.2	H1	28888	30845	-1138400	+	SD5743|chr17:40869303-40876117|q21.31	Unknown	1	1935	-4310	18
20100	20.4	0	0.5	H1	31591	34801	-1134444	+	SD5743|chr17:40869303-40876117|q21.31	Unknown	2365	5559	-686	19
1108	0.7	0	0	H1	35566	35702	-1133543	+	SD5743|chr17:40869303-40876117|q21.31	Unknown	6109	6245	0	20
11142	12.5	0.2	0.5	H1	35703	37315	-1131930	+	SD5721|chr17:40876118-40879131|q21.31	Unknown	1	1608	-1389	21
3836	40.5	0	0	H1	37866	38716	-1130529	+	SD5721|chr17:40876118-40879131|q21.31	Unknown	2147	2997	0	22
7583	36.3	0	0.9	H1	38774	40355	-1128890	+	SD4728|chr17:40879189-40880936|q21.31	Unknown	1	1568	-141	23
1437	1.7	0	1.1	H1	40340	40520	-1128725	+	SD4728|chr17:40879189-40880936|q21.31	Unknown	1530	1708	-1	24	*
4685	40.5	0	1.4	H1	40846	41933	-1127312	+	SD4726|chr17:40881261-40882348|q21.31	Unknown	1	1073	0	25
292	0	0	0	H1	41933	41967	-1127278	+	SD4725|chr17:40882348-40898977|q21.31	Unknown	1	35	-16338	26	*
333	2	0	0	H1	42697	42747	-1126498	+	SD4725|chr17:40882348-40898977|q21.31	Unknown	705	755	-15618	27	*
334	2	0	0	H1	42703	42753	-1126492	+	SD4725|chr17:40882348-40898977|q21.31	Unknown	596	646	-15727	28
24916	24	0	0.1	H1	43070	47178	-1122067	+	SD4725|chr17:40882348-40898977|q21.31	Unknown	906	5012	-11361	29
4341	0.6	0	0	H1	49116	49633	-1119612	+	SD4725|chr17:40882348-40898977|q21.31	Unknown	6949	7466	-8907	30
268	0	0	0	H1	49931	49963	-1119282	+	SD4725|chr17:40882348-40898977|q21.31	Unknown	7763	7795	-8578	31
6025	0.1	0	0	H1	50484	51195	-1118050	+	SD4725|chr17:40882348-40898977|q21.31	Unknown	8315	9026	-7347	32
256	0	0	0	H1	52499	52529	-1116716	+	SD4725|chr17:40882348-40898977|q21.31	Unknown	10330	10360	-6013	33
20256	21.9	0	0.1	H1	54355	57544	-1111701	+	SD4725|chr17:40882348-40898977|q21.31	Unknown	12169	15355	-1018	34
13366	22.5	0	0	H1	55838	57839	-1111406	+	SD4725|chr17:40882348-40898977|q21.31	Unknown	13649	15650	-723	35	*
1767	3.3	0	0	H1	58682	58893	-1110352	+	SD4724|chr17:40898977-40899996|q21.31	Unknown	121	332	-689	36
17046	16.8	0	0.1	H1	60167	62525	-1106720	+	SD4723|chr17:40899996-40915562|q21.31	Unknown	587	2943	-12591	37
9127	12.4	0	0	H1	64522	65707	-1103538	+	SD4723|chr17:40899996-40915562|q21.31	Unknown	4933	6118	-9416	38
29271	36.8	0	0.2	H1	66194	71780	-1097465	+	SD4723|chr17:40899996-40915562|q21.31	Unknown	6605	12179	-3355	39
737	63.6	0	0.6	H1	72457	72801	-1096444	+	SD4723|chr17:40899996-40915562|q21.31	Unknown	12851	13193	-2341	40
7637	8.7	0	0	H1	74204	75147	-1094098	+	SD4723|chr17:40899996-40915562|q21.31	Unknown	14591	15534	0	41	*
9976	3.9	0.8	0.8	H1	75147	76366	-1092879	+	SD4722|chr17:40915562-40916781|q21.31	Unknown	1	1220	0	42
584	0	0	0	H1	76549	76619	-1092626	+	SD4721|chr17:40916800-40917305|q21.31	Unknown	165	235	-271	43
7980	0.2	0	0	H1	77447	78349	-1090896	+	SD4720|chr17:40917305-40920509|q21.31	Unknown	557	1459	-1410	44
5601	16.9	0	0	H1	79319	80094	-1089151	+	SD4720|chr17:40917305-40920509|q21.31	Unknown	2094	2869	0	45	*
10306	9.8	0	0	H1	80094	81383	-1087862	+	SD4719|chr17:40920509-40921798|q21.31	Unknown	1	1290	0	46
10029	0.4	0	0.1	H1	81707	82847	-1086398	+	SD4717|chr17:40922122-40923262|q21.31	Unknown	1	1140	0	47
9207	10	0	0	H1	82847	84102	-1085143	+	SD4702|chr17:40923262-40925416|q21.31	Unknown	1	1256	-897	48	*
2246	0.4	0	0	H1	84745	85001	-1084244	+	SD4702|chr17:40923262-40925416|q21.31	Unknown	1897	2153	0	49	*
11784	23.4	0	0.5	H1	85001	86832	-1082413	+	SD4703|chr17:40925416-40927453|q21.31	Unknown	1	1823	-198	50
1722	1	0	0.5	H1	87384	87586	-1081659	+	SD4701|chr17:40927456-40928393|q21.31	Unknown	354	555	-392	51
4443	0.8	0	0	H1	88002	88506	-1080739	+	SD4700|NA:0-0|NA	Unknown	25	529	-59	52
1092	0	0	0	H1	88811	88933	-1080312	+	SD5725|chr17:40928985-40929748|q21.31	Unknown	242	364	-402	53
282	0	0	0	H1	89302	89333	-1079912	+	SD5725|chr17:40928985-40929748|q21.31	Unknown	735	766	0	54	*
1276	1.3	0	1.3	H1	89333	89491	-1079754	+	SD5724|chr17:40929748-40929958|q21.31	Unknown	1	157	-51	55
285	0	0	0	H1	89606	89643	-1079602	+	SD5726|chr17:40929959-40930179|q21.31	Unknown	60	97	-121	56
3277	61.5	0	0	H1	90116	91277	-1077968	+	SD5727|chr17:40930180-40932839|q21.31	Unknown	352	1513	-1156	57
1153	45.9	0	0	H1	92155	92424	-1076821	+	SD5727|chr17:40930180-40932839|q21.31	Unknown	2400	2669	0	58	*
5947	33.3	0.8	0	H1	92424	93504	-1075741	+	SD5728|chr17:40932839-40933919|q21.31	Unknown	1	1090	0	59
7292	13.5	0	0.1	H1	93581	94586	-1074659	C	SD4704|chr17:40933996-40935001|q21.31	Unknown	0	1005	1	60
634	0	0	0	H1	94586	94657	-1074588	C	SD4705|NA:0-0|NA	Unknown	0	172	101	61	*
1172	1.5	0	0	H1	94807	94942	-1074303	C	SD4706|NA:0-0|NA	Unknown	0	189	54	62
3505	1	0.7	0	H1	95573	95976	-1073269	C	SD4708|chr17:40935939-40937275|q21.31	Unknown	-52	1296	890	63
244	2.7	0	0	H1	96518	96554	-1072691	C	SD4708|chr17:40935939-40937275|q21.31	Unknown	-1005	343	307	64
3196	20	0	0	H1	97508	97987	-1071258	C	SD4710|NA:0-0|NA	Unknown	-648	480	1	65	*
3590	57.4	0.7	0.3	H1	97987	99156	-1070089	C	SD4712|chr17:40938402-40939889|q21.31	Unknown	0	1492	318	66
9640	1.4	0.5	0	H1	99676	100786	-1068459	C	SD4711|chr17:40939890-40941201|q21.31	Unknown	-201	1117	1	67
2660	2.2	0	0.9	H1	100790	101112	-1068133	C	SD4714|chr17:42486665-42486991|q21.32	Unknown	-1	320	1	68	*
5572	21.9	0.2	0.6	H1	101112	101970	-1067275	C	SD4715|chr17:42485778-42486665|q21.32	Unknown	0	888	33	69
3240	1.3	0.3	0	H1	102258	102635	-1066610	C	SD1748|NA:0-0|NA	Unknown	-94	379	1	70
989	62.6	0	1	H1	102635	103028	-1066217	C	SD1746|chr17:41986081-41986466|q21.31	Unknown	0	390	1	71	*
1226	6.6	0	0	H1	103028	103193	-1066052	C	SD1745|chr17:40943443-40943730|q21.31	Unknown	0	288	123	72
369	9.6	0	0	H1	103333	103384	-1065861	C	SD1744|chr17:41984811-41985794|q21.31	Unknown	-19	903	852	73
2238	3.7	0.3	4	H1	103621	103931	-1065314	C	SD1744|chr17:41984811-41985794|q21.31	Unknown	-275	647	348	74
614	0	0	0	H1	104758	104826	-1064419	C	SD1742|NA:0-0|NA	Unknown	-206	78	10	75
8903	2	0.4	0.9	H1	105043	106112	-1063133	C	SD1669|NA:0-0|NA	Unknown	-170	1251	188	76
1675	0	0	1.1	H1	106410	106602	-1062643	C	SD1740|chr17:40946714-40947017|q21.31	Unknown	-111	191	1	77	*
10369	2.2	1.5	0	H1	106602	107854	-1061391	C	SD1738|NA:0-0|NA	Unknown	0	1272	1	78
2087	2.4	0.4	0	H1	107854	108101	-1061144	C	SD1737|NA:0-0|NA	Unknown	0	249	1	79	*
3307	2.3	0.5	2	H1	108113	108519	-1060726	C	SD1734|chr17:40952521-40952932|q21.31	Unknown	0	402	2	80
2936	1.2	0	0.3	H1	108524	108862	-1060383	C	SD1733|chr17:40952932-40953270|q21.31	Unknown	0	338	1	81
10421	1.6	0.3	0.8	H1	108866	110105	-1059140	C	SD1669|NA:0-0|NA	Unknown	0	1421	188	82
1675	0	0	1.1	H1	110403	110595	-1058650	C	SD1740|chr17:40946714-40947017|q21.31	Unknown	-111	191	1	83	*
10364	2.2	1.5	0	H1	110595	111847	-1057398	C	SD1738|NA:0-0|NA	Unknown	0	1272	1	84
2087	2.4	0.4	0	H1	111847	112094	-1057151	C	SD1737|NA:0-0|NA	Unknown	0	249	1	85	*
3307	2.3	0.5	2	H1	112106	112512	-1056733	C	SD1734|chr17:40952521-40952932|q21.31	Unknown	0	402	2	86
2879	1.2	0	0.3	H1	112517	112855	-1056390	C	SD1733|chr17:40952932-40953270|q21.31	Unknown	0	338	1	87	*
3747	15.8	1.1	0.5	H1	112855	113415	-1055830	C	SD1732|chr17:40953270-40953832|q21.31	Unknown	0	566	3	88
9673	3.2	0.1	0.9	H1	113417	114628	-1054617	C	SD1787|chr17:40953832-40957413|q21.31	Unknown	0	3564	2363	89
4216	47.7	0	0.7	H1	115570	116659	-1052586	C	SD1787|chr17:40953832-40957413|q21.31	Unknown	-2143	1421	339	90
305	9.1	0	0	H1	117037	117080	-1052165	+	SD1785|chr17:41975947-41976096|q21.31	Unknown	40	83	-67	91	*
2054	50.5	0.2	3.3	H1	117076	117705	-1051540	C	SD4602|NA:0-0|NA	Unknown	0	1213	603	92
1799	37.5	1.2	0.7	H1	118022	118451	-1050794	C	SD4602|NA:0-0|NA	Unknown	-781	432	1	93
1499	65.5	0.4	0	H1	118861	119545	-1049700	C	SD4607|NA:0-0|NA	Unknown	-404	3082	2395	94
446	7.9	0	0	H1	123315	123377	-1045868	C	SD7471|chr17:57842513-57925487|q23.3	Unknown	-79101	2496	2434	95
1556	0	0	0	H1	123927	124107	-1045138	C	SD4606|chr17:41958254-41964774|q21.31	Unknown	-173	6292	6112	96
30686	26.6	0.2	0.1	H1	125163	130169	-1039076	C	SD4606|chr17:41958254-41964774|q21.31	Unknown	-1408	5057	49	97
4604	0.4	0	0.2	H1	130471	131004	-1038241	C	SD1760|NA:0-0|NA	Unknown	-184	544	12	98
968	0.8	4.9	0.8	H1	131354	131476	-1037769	+	SD1761|NA:0-0|NA	Unknown	304	431	-169	99
6273	23	0.3	0.2	H1	131645	132684	-1036561	+	SD1762|chr17:41955779-41956818|q21.31	Unknown	1	1041	(0) 1	0
2418	4.4	1.1	3.2	H1	132686	133035	-1036210	+	SD1764|chr17:41955428-41955777|q21.31	Unknown	1	343	(0) 1	1
2809	3	0.3	0.6	H1	133348	133711	-1035534	+	SD4647|chr17:34451435-34451896|q12	Unknown	1	363	(0) 1	2
3010	0.6	0	0	H1	133850	134205	-1035040	+	SD4646|chr17:34450804-34451435|q12	Unknown	140	495	(134) 1	3
1986	0.4	0	0	H1	134356	134586	-1034659	+	SD4644|chr17:34450552-34450787|q12	Unknown	1	231	(0) 1	4	*
3245	8	0.2	0	H1	134586	135011	-1034234	+	SD4643|chr17:31317463-31318213|q12	Unknown	1	427	(0) 1	5
1505	30.6	0	0.4	H1	135198	135469	-1033776	+	SD4642|chr17:40975429-40975884|q21.31	Unknown	184	454	(0) 1	6	*
1696	1.9	0	0	H1	135469	135673	-1033572	+	SD4641|chr17:40975884-40976088|q21.31	Unknown	1	205	(0) 1	7	*
3098	1.6	0	0	H1	135673	136047	-1033198	+	SD4639|NA:0-0|NA	Unknown	1	375	(447) 1	8
1199	0.7	0	0	H1	136858	137002	-1032243	+	SD5897|NA:0-0|NA	Unknown	198	342	(277) 1	9
7355	29.4	0	1.1	H1	137727	139065	-1030180	+	SD5898|chr17:41949332-41951184|q21.31	Unknown	452	1776	(57) 1	10
854	0	0	0	H1	139193	139293	-1029952	+	SD5900|chr17:40979537-40979708|q21.31	Unknown	72	172	(0) 1	11
911	0	0	0	H1	139335	139443	-1029802	+	SD4631|chr17:40979750-40979858|q21.31	Unknown	1	109	(0) 1	12
1298	55.1	0	0	H1	139775	140168	-1029077	+	SD4736|NA:0-0|NA	Unknown	1	394	(0) 1	13
504	6	0	13.7	H1	140168	140283	-1028962	+	SD4739|NA:0-0|NA	Unknown	15	116	(0) 1	14	*
1575	1.5	0	0	H1	140264	140461	-1028784	+	SD4709|chr17:40980679-40980876|q21.31	Unknown	1	198	(0) 1	15	*
3381	1.2	0	0.2	H1	140461	140865	-1028380	+	SD3957|chr17:40980876-40981280|q21.31	Unknown	1	404	(0) 1	16
2130	0	0	0	H1	140865	141112	-1028133	+	SD3958|NA:0-0|NA	Unknown	1	248	(0) 1	17	*
2487	3.6	0	0	H1	141112	141420	-1027825	+	SD2826|NA:0-0|NA	Unknown	1	309	(0) 1	18
731	11	0	2.5	H1	141346	141466	-1027779	+	SD3958|NA:0-0|NA	Unknown	128	245	(3) 1	19	*
543	5.6	0	0	H1	141462	141533	-1027712	+	SD2821|NA:0-0|NA	Unknown	435	506	(0) 1	20	*
609	31.1	1.3	2.4	H1	141490	141789	-1027456	+	SD2828|chr17:63658228-63658535|q24.2	Unknown	3	299	(9) 1	21	*
5488	14.3	1.1	0.2	H1	141533	142462	-1026783	+	SD2819|chr17:34438239-34440020|q12	Unknown	1	938	(471) 1	22
1680	1	0	0	H1	142445	142639	-1026606	+	SD2825|chr17:40982860-40983054|q21.31	Unknown	1	195	(0) 1	23	*
4563	2	0	0.5	H1	142639	143197	-1026048	+	SD2829|NA:0-0|NA	Unknown	1	556	(0) 1	24
1478	15.5	0	0	H1	143197	143409	-1025836	+	SD2830|chr17:41945055-41945267|q21.31	Unknown	1	213	(0) 1	25	*
7783	26.8	0	0.1	H1	143409	144674	-1024571	+	SD2832|NA:0-0|NA	Unknown	1	1265	(101) 1	26
4154	0.6	0	0	H1	145373	145848	-1023397	+	SD4733|NA:0-0|NA	Unknown	536	1011	(3) 1	27
1952	7.7	0.7	0	H1	146416	146688	-1022557	C	SD8043|chr17:31271041-31272719|q12	Unknown	-232	1414	1140 1	28	*
4013	36.4	0	0.9	H1	146645	147456	-1021789	+	SD4731|chr17:27368175-27368990|q11.2	Unknown	1	805	(0) 1	29	*
5375	9.9	1.1	1.1	H1	146982	147797	-1021448	C	SD8043|chr17:31271041-31272719|q12	Unknown	-830	816	1 1	30	*
10124	18	0	0	H1	147456	148898	-1020347	+	SD4748|chr17:41939022-41941009|q21.31	Unknown	1	1443	(545) 1	31
1952	0	0	0	H1	149459	149681	-1019564	+	SD4756|chr17:41938505-41939014|q21.31	Unknown	9	231	(279) 1	32
1688	58.9	0	0	H1	149976	150549	-1018696	+	SD4755|chr17:41937916-41938497|q21.31	Unknown	9	582	(0) 1	33
8080	0	0	0	H1	150938	151854	-1017391	+	SD4753|NA:0-0|NA	Unknown	1	917	(0) 1	34
6730	36	0	0	H1	151854	153150	-1016095	+	SD4752|chr17:40992269-40993849|q21.31	Unknown	1	1297	(284) 1	35	*
6476	1.2	0	0.3	H1	153510	154281	-1014964	+	SD4750|chr17:40993921-40995104|q21.31	Unknown	1	770	(406) 1	36
9487	23.1	0.1	0.3	H1	154926	156420	-1012825	+	SD4747|chr17:63274100-63276169|q24.2	Unknown	3	1494	(179) 1	37
1880	0.5	0	0	H1	157206	157426	-1011819	+	SD4745|NA:0-0|NA	Unknown	389	609	(63) 1	38
1475	2.7	0	0	H1	157790	157976	-1011269	+	SD4744|NA:0-0|NA	Unknown	3	189	(4188) 1	39
270	0	0	0	H1	158657	158695	-1010550	+	SD4744|NA:0-0|NA	Unknown	857	895	(3482) 1	40
1111	0.8	0	0	H1	161014	161144	-1008101	+	SD4744|NA:0-0|NA	Unknown	2921	3051	(1326) 1	41
356	2	0	0	H1	163385	163435	-1005810	+	SD4740|NA:0-0|NA	Unknown	122	172	(1232) 1	42
3753	5.4	0	0.4	H1	164022	164504	-1004741	+	SD4740|NA:0-0|NA	Unknown	759	1239	(165) 1	43
1151	0.7	0	7.3	H1	164799	164960	-1004285	+	SD4690|NA:0-0|NA	Unknown	111	261	(985) 1	44
2512	49.2	0	0.1	H1	165263	165915	-1003330	+	SD4690|NA:0-0|NA	Unknown	250	901	(345) 1	45
320	0	0	8.9	H1	166241	166289	-1002956	+	SD4690|NA:0-0|NA	Unknown	1202	1246	(0) 1	46	*
10812	18.7	0	1.3	H1	166289	167957	-1001288	+	SD4691|NA:0-0|NA	Unknown	1	1648	(6952) 1	47
1651	4	0	0.5	H1	168462	168660	-1000585	+	SD4691|NA:0-0|NA	Unknown	2146	2343	(6257) 1	48
1941	0.9	0	0	H1	169127	169358	-999887	+	SD4691|NA:0-0|NA	Unknown	2805	3036	(5564) 1	49
260	29.9	0	1.9	H1	169943	170051	-999194	+	SD4691|NA:0-0|NA	Unknown	3032	3138	(5462) 1	50
22114	20.6	0	0.5	H1	170960	174204	-995041	+	SD4691|NA:0-0|NA	Unknown	4426	7653	(947) 1	51
2790	56.3	0	2.1	H1	174485	175423	-993822	+	SD4691|NA:0-0|NA	Unknown	7670	8589	(11) 1	52
13044	5	1.9	0.8	H1	175717	177319	-991926	+	SD1747|chr17:63252902-63254796|q24.2	Unknown	285	1904	(0) 1	53
410	3.9	0	0	H1	177319	177369	-991876	+	SD4590|chr17:63252574-63252902|q24.2	Unknown	1	51	(207) 1	54	*
364	13.6	0	0	H1	177364	177422	-991823	+	SD4590|chr17:63252574-63252902|q24.2	Unknown	162	220	(38) 1	55	*
6394	5.9	0.2	0	H1	177481	178362	-990883	+	SD4592|NA:0-0|NA	Unknown	36	919	(0) 1	56
324	9.1	0	0	H1	178367	178410	-990835	+	SD4593|chr17:63250025-63251571|q24.2	Unknown	1	44	(1183) 1	57
749	1	0	11.4	H1	178627	178743	-990502	+	SD4596|chr5:140033042-140033159|q31.3	Unknown	1	105	(0) 1	58
3821	0.7	0	0	H1	178746	179204	-990041	+	SD4597|chr5:140032215-140032675|q31.3	Unknown	1	459	(0) 1	59
8437	1.4	0	0	H1	179206	180157	-989088	+	SD4598|chr5:140030562-140031519|q31.3	Unknown	1	952	(6) 1	60
532	0	0	1.6	H1	181008	181070	-988175	+	SD1807|NA:0-0|NA	Unknown	555	616	(4308) 1	61
253	42.1	0	0	H1	181666	181722	-987523	+	SD1807|NA:0-0|NA	Unknown	1212	1268	(3656) 1	62
1308	55.6	0	0.3	H1	182198	182572	-986673	+	SD1807|NA:0-0|NA	Unknown	1740	2113	(2811) 1	63
869	0	0	0	H1	183896	183987	-985258	+	SD1807|NA:0-0|NA	Unknown	3370	3461	(1463) 1	64
273	0	0	0	H1	184804	184832	-984413	+	SD1807|NA:0-0|NA	Unknown	4262	4290	(634) 1	65
1563	34.4	0	0	H1	185202	185474	-983771	+	SD1807|NA:0-0|NA	Unknown	4652	4924	(0) 1	66
5320	0.3	0	0	H1	186445	187015	-982230	+	SD1794|chr17:41682478-41685507|q21.31	Unknown	151	721	(2303) 1	67
535	1.6	0	0	H1	187478	187538	-981707	+	SD1794|chr17:41682478-41685507|q21.31	Unknown	1183	1243	(1781) 1	68
2555	56.5	0	0	H1	188333	189074	-980171	+	SD1794|chr17:41682478-41685507|q21.31	Unknown	2035	2776	(248) 1	69
7840	4	1.1	2.7	H1	190437	191455	-977790	C	SD4603|chr17:41972641-41973690|q21.31	Unknown	-66	1003	1 1	70
3575	55.8	0.1	3	H1	191456	192685	-976560	C	SD4602|NA:0-0|NA	Unknown	-4	1209	15 1	71
18568	6.2	0	0.9	H1	192746	194976	-974269	C	SD4604|NA:0-0|NA	Unknown	-47	3167	958 1	72
4628	42.3	0.2	1.1	H1	194572	195583	-973662	C	SD4604|NA:0-0|NA	Unknown	-1850	1364	362 1	73	*
714	0	0	0	H1	195946	196026	-973219	C	SD4611|NA:0-0|NA	Unknown	-2	1131	1051 1	74
2132	53.5	0	0	H1	196537	197123	-972122	C	SD4611|NA:0-0|NA	Unknown	-540	593	7 1	75
751	34.2	0	0.7	H1	197916	198065	-971180	C	SD4615|chr17:41650183-41674686|q21.31	Unknown	-774	22515	22367 1	76
1912	55.5	0	0.1	H1	200796	201726	-967519	C	SD4615|chr17:41650183-41674686|q21.31	Unknown	-3625	19664	18735 1	77	*
2628	14	3.1	2.5	H1	201281	201726	-967519	C	SD1035|chr2:128320083-128321591|q14.3	Unknown	-676	823	375 1	78
445	5.6	1.4	0	H1	201667	201737	-967508	C	SD6857|chr2:112331466-112341052|q13	Unknown	-9049	498	427 1	79	*
344	0	0	0	H1	203174	203213	-966032	C	SD4615|chr17:41650183-41674686|q21.31	Unknown	-5994	17295	17256 1	80
1136	76.5	0	0.9	H1	205091	205992	-963253	C	SD4615|chr17:41650183-41674686|q21.31	Unknown	-7902	15387	14494 1	81
1162	22	0	0	H1	206754	206921	-962324	C	SD4615|chr17:41650183-41674686|q21.31	Unknown	-9557	13732	13565 1	82
1389	16.7	0	0	H1	207562	207747	-961498	C	SD4615|chr17:41650183-41674686|q21.31	Unknown	-10353	12936	12751 1	83
58862	33.9	0	0.1	H1	208209	218294	-950951	C	SD4615|chr17:41650183-41674686|q21.31	Unknown	-10995	12294	2224 1	84
255	0	0	0	H1	218754	218781	-950464	C	SD4615|chr17:41650183-41674686|q21.31	Unknown	-21509	1780	1753 1	85
863	72	0	0	H1	219073	219537	-949708	C	SD4615|chr17:41650183-41674686|q21.31	Unknown	-21828	1461	997 1	86
227	5.7	0	0	H1	237869	237903	-931342	C	SD4799|chr15:26138519-26144698|q13.1	Unknown	-1770	4234	4200 1	87
303	15.6	0	0	H1	250731	250775	-918470	+	SD11556|chr5:288807-295344|p15.33	Unknown	983	1027	(5389) 1	88
271	17.6	5.9	0	H1	250739	250789	-918456	C	SD8888|chr20:48424178-48468432|q13.13	Unknown	-36111	4417	4364 1	89	*
323	23.2	0	1.2	H1	257053	257135	-912110	+	SD6214|chr22:29786167-29799533|q12.2	Unknown	7995	8076	(5177) 1	90
231	29.7	6.8	0	H1	260831	260904	-908341	+	SD707|NA:0-0|NA	Unknown	10830	10908	(4851) 1	91
237	21.3	1.6	4.8	H1	263272	263335	-905910	+	SD104|chr22:20633423-20637420|q11.22	Unknown	1396	1457	(2541) 1	92
247	16.7	0	0	H1	309063	309116	-860129	C	SD2347|chr6:57794310-57902237|p11.2	Unknown	-2336	101975	101922 1	93
249	25	0	0	H1	323765	323820	-845425	C	SD7571|chr9:68192088-68203423|q13	Unknown	-559	10757	10702 1	94
236	31.1	6	0.7	H1	347804	347936	-821309	C	SD1418|chr17_random:1713818-1752566|NU	LL Unknown	-15106	23376	23237 1	95	*
246	21.2	12.2	1.6	H1	347849	347963	-821282	+	SD7813|chr6:26775200-26779306|p22.1	Unknown	55	181	(3959) 1	96
232	27.3	4	8.4	H1	348440	348563	-820682	C	SD5977|NA:0-0|NA	Unknown	-129	295	177 1	97
349	24.9	1.9	6.8	H1	359569	359723	-809522	C	SD3476|chr3:124910977-124918515|q21.1	Unknown	-6570	872	725 1	98
225	25.8	1.6	0	H1	365520	365581	-803664	+	SD3476|chr3:124910977-124918515|q21.1	Unknown	718	780	(6662) 1	99	*
241	32	4	5.7	H1	365553	365678	-803567	C	SD73|chr20:48499425-48517336|q13.13	Unknown	-4561	12601	12478 2	0
227	18.3	8	13.1	H1	457885	457972	-711273	C	SD10296|chr22:22642492-22653868|q11.23	Unknown	-3489	7840	7757 2	1
235	27.5	5.8	0	H1	466771	466839	-702406	+	SD12041|chr14:105141161-105142740|q32.	33 Unknown	74	146	(1434) 2	2
237	18	0	0	H1	479145	479194	-690051	+	SD2525|chr5:68921756-68944185|q13.2	Unknown	4483	4532	(17883) 2	3
238	15	0	0	H1	497887	497926	-671319	C	SD4784|chr15:26053471-26067317|q13.1	Unknown	-2717	10994	10955 2	4
248	24.8	3.5	6.2	H1	507338	507453	-661792	C	SD5190|chr7:73878329-73925343|q11.23	Unknown	-32253	14747	14635 2	5
231	23.4	7.1	4	H1	510221	510318	-658927	+	SD3248|chr10:51630663-51671002|q11.23	Unknown	24065	24165	(16160) 2	6
315	23	1.4	0	H1	519609	519682	-649563	C	SD807|chr2:156944975-156947184|q24.1	Unknown	-102	2108	2034 2	7
240	21.8	13.5	2	H1	586936	587024	-582221	C	SD3854|NA:0-0|NA	Unknown	-15913	18885	18787 2	8	*
257	22.5	8.2	2.6	H1	586956	587028	-582217	+	SD5476|chr9:38789843-38800000|p13.1	Unknown	2431	2507	(7633) 2	9	*
283	14.8	1.9	0	H1	586971	587024	-582221	C	SD10153|chr1:120557941-120573845|p11.2	Unknown	-7740	8156	8102 2	10
243	26.1	1.5	0	H1	616185	616249	-552996	C	SD1777|chr17:22984442-22990924|q11.2	Unknown	-4781	1541	1476 2	11	*
333	20.5	3.3	3.3	H1	616204	616294	-552951	C	SD9559|chr16:22464053-22532629|p12.1	Unknown	-38037	30153	30063 2	12
232	16.7	8.3	0	H1	617276	617323	-551922	+	SD9732|NA:0-0|NA	Unknown	703	754	(9170) 2	13
227	11.4	0	0	H1	619969	620003	-549242	C	SD7942|chr2:96129535-96152129|q11.2	Unknown	-2859	19699	19665 2	14
245	20.8	0	2.1	H1	626131	626179	-543066	C	SD9495|chr16:86504383-86514320|q24.2	Unknown	-5510	4307	4260 2	15
249	22.1	9.2	1.1	H1	628965	629051	-540194	+	SD8448|chr1:238739248-238800000|q43	Unknown	47222	47315	(12628) 2	16	*
255	13.2	0	0	H1	628965	629002	-540243	C	SD4561|NA:0-0|NA	Unknown	-1071	14407	14370 2	17
230	24.2	4.3	6.6	H1	637956	638048	-531197	+	SD5765|NA:0-0|NA	Unknown	1213	1303	(5734) 2	18
226	14.1	4.5	3	H1	652727	652792	-516453	C	SD322|NA:0-0|NA	Unknown	-512	2015	1949 2	19	*
264	14.9	4.3	0	H1	652742	652788	-516457	+	SD9511|chr16:16467283-16481298|p13.11	Unknown	10043	10091	(3923) 2	20
262	21.4	9.3	2.2	H1	652747	652832	-516413	+	SD3668|chr9:33372133-33393738|p13.3	Unknown	8562	8653	(12746) 2	21	*
284	18.6	0	4.3	H1	652747	652819	-516426	C	SD12028|chr7:48663223-48683765|p12.3	Unknown	-12963	7266	7197 2	22	*
302	9.6	0	3.9	H1	652747	652800	-516445	C	SD9058|chr22:42943508-42987158|q13.31	Unknown	-40390	1908	1857 2	23
249	19.6	3.5	1.7	H1	655910	655966	-513279	C	SD10221|chr5:49725456-49759303|q11.1	Unknown	-19085	14481	14424 2	24
229	13.5	0	0	H1	663774	663810	-505435	+	SD6800|chrX:142886489-142985928|q27.3	Unknown	22610	22646	(76700) 2	25
14310	25.3	0	0.6	H1	680448	682722	-486523	+	SD4616|chr17:41520700-41533001|q21.31	Unknown	164	2425	(9201) 2	26
378	4.3	0	0	H1	683414	683459	-485786	+	SD4616|chr17:41520700-41533001|q21.31	Unknown	2968	3013	(8613) 2	27
10992	18.1	0	1	H1	685002	686644	-482601	+	SD4616|chr17:41520700-41533001|q21.31	Unknown	4489	6115	(5511) 2	28
10535	29.9	0	0.9	H1	686729	688613	-480632	+	SD4616|chr17:41520700-41533001|q21.31	Unknown	6150	8017	(3609) 2	29
15547	8.2	0	0.8	H1	689798	691805	-477440	+	SD4616|chr17:41520700-41533001|q21.31	Unknown	9178	11170	(456) 2	30
3919	3.6	0	0.4	H1	692119	692586	-476659	+	SD4616|chr17:41520700-41533001|q21.31	Unknown	11161	11626	(0) 2	31
364	9.3	0	7.4	H1	692897	692954	-476291	+	SD4617|chr17:41534429-41539337|q21.31	Unknown	4462	4515	(0) 2	32
1020	41.5	0	0	H1	694014	694230	-475015	C	SD4617|chr17:41534429-41539337|q21.31	Unknown	0	4515	4299 2	33
14504	47.2	0	0.3	H1	694552	698097	-471148	C	SD4617|chr17:41534429-41539337|q21.31	Unknown	-216	4299	766 2	34
1485	3.4	0	1.7	H1	698686	698866	-470379	C	SD4617|chr17:41534429-41539337|q21.31	Unknown	-4282	233	56 2	35
247	14	0	4	H1	719399	719450	-449795	+	SD2721|NA:0-0|NA	Unknown	30915	30964	(61467) 2	36
23657	31.5	0.1	0	H1	728913	733017	-436228	C	SD12088|NA:0-0|NA	Unknown	0	73733	69624 2	37
9778	16.1	0	0	H1	733723	735061	-434184	C	SD12088|NA:0-0|NA	Unknown	-4816	68917	67579 2	38
3278	0.3	0	0	H1	735598	735975	-433270	C	SD12088|NA:0-0|NA	Unknown	-6686	67047	66670 2	39
17884	24.2	0	0	H1	736560	739279	-429966	C	SD12088|NA:0-0|NA	Unknown	-7634	66099	63380 2	40
19826	42.4	0.2	0.6	H1	739589	743900	-425345	C	SD12088|NA:0-0|NA	Unknown	-10349	63384	59092 2	41
42988	25.5	0.1	0.1	H1	744419	751091	-418154	C	SD12088|NA:0-0|NA	Unknown	-15160	58573	51899 2	42
25087	25.9	0	0.2	H1	751569	755488	-413757	C	SD12088|NA:0-0|NA	Unknown	-22311	51422	47511 2	43
12510	25.8	0	0.1	H1	755999	757946	-411299	C	SD12088|NA:0-0|NA	Unknown	-26733	47000	45055 2	44
1000	0.8	0	0	H1	758539	758656	-410589	C	SD12088|NA:0-0|NA	Unknown	-29271	44462	44345 2	45
50956	17.3	0	0.1	H1	759256	766236	-403009	C	SD12088|NA:0-0|NA	Unknown	-30002	43731	36758 2	46
24551	42.2	0.4	0.4	H1	767684	772941	-396304	C	SD12088|NA:0-0|NA	Unknown	-38414	35319	30058 2	47
10859	38.2	0	0.1	H1	773624	775712	-393533	C	SD12088|NA:0-0|NA	Unknown	-44358	29375	27288 2	48
5627	9.1	0.3	0	H1	776657	777351	-391894	C	SD12088|NA:0-0|NA	Unknown	-47382	26351	25655 2	49
10252	43	0.1	0.4	H1	777952	780162	-389083	C	SD12088|NA:0-0|NA	Unknown	-48673	25060	22857 2	50	*
19002	29.5	0	0.3	H1	778163	781476	-387769	C	SD12088|NA:0-0|NA	Unknown	-48884	24849	21544 2	51	*
91535	26.3	0.2	0.4	H1	778591	793637	-375608	C	SD12088|NA:0-0|NA	Unknown	-49306	24427	9408 2	52
270	0	0	0	H1	793940	793972	-375273	C	SD12088|NA:0-0|NA	Unknown	-64628	9105	9073 2	53
9034	21.8	0	0.1	H1	795208	796623	-372622	C	SD12088|NA:0-0|NA	Unknown	-65881	7852	6438 2	54
685	0	0	0	H1	797204	797287	-371958	C	SD12088|NA:0-0|NA	Unknown	-67876	5857	5774 2	55
5970	57.8	0	0.1	H1	800872	802827	-366418	C	SD12088|NA:0-0|NA	Unknown	-71535	2198	246 2	56
1156	5.7	0	0	H1	809345	809501	-359744	C	SD12088|NA:0-0|NA	Unknown	-71514	2219	2063 2	57
1066	80.3	0	0.5	H1	810769	812082	-357163	+	SD4615|chr17:41650183-41674686|q21.31	Unknown	997	2304	(20985) 2	58
46863	18.3	0	0.2	H1	813243	819984	-349261	+	SD4615|chr17:41650183-41674686|q21.31	Unknown	2589	9314	(13975) 2	59
238	0	0	0	H1	820385	820413	-348832	+	SD4615|chr17:41650183-41674686|q21.31	Unknown	9711	9739	(13550) 2	60
10650	50.4	0	0.6	H1	820736	823589	-345656	+	SD4615|chr17:41650183-41674686|q21.31	Unknown	10059	12895	(10394) 2	61
449	0	0	0	H1	824370	824426	-344819	+	SD4615|chr17:41650183-41674686|q21.31	Unknown	13676	13732	(9557) 2	62
1057	76.5	0	0.2	H1	825190	826085	-343160	+	SD4615|chr17:41650183-41674686|q21.31	Unknown	14494	15387	(7902) 2	63
366	0	0	0	H1	827970	828013	-341232	+	SD4615|chr17:41650183-41674686|q21.31	Unknown	17256	17299	(5990) 2	64
364	20	0	0	H1	829832	829906	-339339	+	SD4615|chr17:41650183-41674686|q21.31	Unknown	19590	19664	(3625) 2	65
582	40.6	0	0	H1	833348	833470	-335775	+	SD4615|chr17:41650183-41674686|q21.31	Unknown	22367	22489	(800) 2	66
2116	53.7	0	0	H1	834277	834863	-334382	+	SD4611|NA:0-0|NA	Unknown	7	593	(540) 2	67
714	0	0	0	H1	835384	835464	-333781	+	SD4611|NA:0-0|NA	Unknown	1051	1131	(2) 2	68
20378	15	0	0	H1	835827	838515	-330730	+	SD4604|NA:0-0|NA	Unknown	362	3049	(165) 2	69
2615	48.7	0	4.8	H1	838699	839483	-329762	+	SD4602|NA:0-0|NA	Unknown	20	768	(445) 2	70
2109	51.7	0	2	H1	839332	839933	-329312	+	SD4602|NA:0-0|NA	Unknown	620	1209	(4) 2	71	*
7937	3.7	1.1	2.3	H1	839934	840948	-328297	+	SD4603|chr17:41972641-41973690|q21.31	Unknown	1	1003	(66) 2	72
2520	56.6	0	0	H1	842311	843052	-326193	C	SD1794|chr17:41682478-41685507|q21.31	Unknown	-248	2776	2035 2	73
553	0	0	0	H1	843844	843904	-325341	C	SD1794|chr17:41682478-41685507|q21.31	Unknown	-1781	1243	1183 2	74
5334	0.2	0	0	H1	844372	844942	-324303	C	SD1794|chr17:41682478-41685507|q21.31	Unknown	-2303	721	151 2	75
1463	68.6	0	0	H1	846532	847194	-322051	C	SD1807|NA:0-0|NA	Unknown	0	4924	4262 2	76
869	0	0	0	H1	847997	848088	-321157	C	SD1807|NA:0-0|NA	Unknown	-1463	3461	3370 2	77
1395	53.9	0	1.3	H1	849339	849731	-319514	C	SD1807|NA:0-0|NA	Unknown	-2797	2127	1740 2	78
267	41.4	0	0	H1	850202	850259	-318986	C	SD1807|NA:0-0|NA	Unknown	-3655	1269	1212 2	79
562	0	0	0	H1	850863	850924	-318321	C	SD1807|NA:0-0|NA	Unknown	-4308	616	555 2	80
8627	0.5	0	0	H1	851783	852733	-316512	C	SD4598|chr5:140030562-140031519|q31.3	Unknown	-7	951	1 2	81
3764	0.2	0	2.6	H1	852735	853205	-316040	C	SD4597|chr5:140032215-140032675|q31.3	Unknown	0	459	1 2	82
864	0	0	0	H1	853208	853312	-315933	C	SD4596|chr5:140033042-140033159|q31.3	Unknown	0	105	1 2	83
256	24	0	5.6	H1	854502	854576	-314669	C	SD2030|chr2:111735774-111963107|q13	Unknown	-206196	20574	20504 2	84
6601	53.1	0	1.1	H1	856725	858543	-310702	C	SD5774|chr17:63422655-63426692|q24.2	Unknown	-110	2720	921 2	85	*
7626	45.1	0	0.7	H1	857769	859472	-309773	C	SD5774|chr17:63422655-63426692|q24.2	Unknown	-1137	1693	1 2	86
7652	16.8	0	1.4	H1	859496	860621	-308624	C	SD5772|chr17:63416280-63420395|q24.2	Unknown	0	4011	2901 2	87
6651	6.2	0	0.3	H1	861045	861825	-307420	C	SD5772|chr17:63416280-63420395|q24.2	Unknown	-1489	2522	1744 2	88
3686	41.3	0.8	2.5	H1	861810	862870	-306375	C	SD5772|chr17:63416280-63420395|q24.2	Unknown	-2228	1783	741 2	89	*
6728	14.4	0	1.9	H1	862320	863354	-305891	C	SD5772|chr17:63416280-63420395|q24.2	Unknown	-2729	1282	267 2	90
1963	5.5	0	0.4	H1	863651	863888	-305357	C	SD5722|chr17:63403996-63412672|q24.2	Unknown	0	8512	8276 2	91
13965	28.2	0	1.1	H1	864216	866596	-302649	C	SD5722|chr17:63403996-63412672|q24.2	Unknown	-231	8281	5928 2	92	*
18165	4	0	0.8	H1	865444	867609	-301636	C	SD5722|chr17:63403996-63412672|q24.2	Unknown	-1443	7069	4922 2	93
5673	6.6	0.6	0.3	H1	867920	868622	-300623	C	SD5722|chr17:63403996-63412672|q24.2	Unknown	-3577	4935	4231 2	94
4656	2.1	1.3	4.8	H1	868919	869517	-299728	C	SD5722|chr17:63403996-63412672|q24.2	Unknown	-4276	4236	3658 2	95
4648	2.5	0.2	0.2	H1	869833	870363	-298882	C	SD5722|chr17:63403996-63412672|q24.2	Unknown	-5139	3373	2843 2	96
917	5	0	1.7	H1	870974	871094	-298151	C	SD5722|chr17:63403996-63412672|q24.2	Unknown	-6239	2273	2155 2	97
240	23.5	0	3.1	H1	872753	872818	-296427	C	SD5722|chr17:63403996-63412672|q24.2	Unknown	-7868	644	581 2	98
332	6	0	2	H1	873247	873297	-295948	C	SD5722|chr17:63403996-63412672|q24.2	Unknown	-8350	162	113 2	99
868	71.7	0	1.2	H1	873604	874106	-295139	C	SD5720|chr17:41713832-41715074|q21.31	Unknown	-185	1009	513 3	0
1035	18.9	0	0	H1	874672	874819	-294426	C	SD5719|NA:0-0|NA	Unknown	-13	945	798 3	1
818	1.1	0	0	H1	875450	875539	-293706	C	SD5719|NA:0-0|NA	Unknown	-775	183	94 3	2
3218	1.6	0.5	0.8	H1	875959	876335	-292910	C	SD5717|chr17:63392939-63393399|q24.2	Unknown	-85	376	1 3	3
1101	0	0	0	H1	877310	877428	-291817	C	SD5715|NA:0-0|NA	Unknown	0	462	344 3	4
503	3.3	0	0	H1	877891	877951	-291294	C	SD5714|NA:0-0|NA	Unknown	-118	61	1 3	5
637	0	0	0	H1	878471	878539	-290706	C	SD2166|chr17:63389820-63391280|q24.2	Unknown	-163	1292	1224 3	6	*
11029	1.2	0.5	0.5	H1	878537	879784	-289461	C	SD2166|chr17:63389820-63391280|q24.2	Unknown	-207	1248	1 3	7
9446	2.7	0	1.3	H1	879784	880884	-288361	C	SD2169|chr17:63388291-63389820|q24.2	Unknown	0	1508	422 3	8	*
1975	59.2	0	2	H1	881729	882442	-286803	C	SD2170|NA:0-0|NA	Unknown	-414	729	30 3	9
733	0	0	17.3	H1	882368	882489	-286756	C	SD2170|NA:0-0|NA	Unknown	-1039	104	1 3	10	*
409	31.6	0	0	H1	882501	882576	-286669	C	SD6025|NA:0-0|NA	Unknown	0	484	409 3	11
1970	51.4	2.3	1.1	H1	883144	883700	-285545	C	SD6024|NA:0-0|NA	Unknown	-140	564	1 3	12
6215	31.1	0.4	0.5	H1	883707	884768	-284477	C	SD6021|chr17:63380454-63381577|q24.2	Unknown	0	1062	2 3	13
4456	0.4	0	0	H1	885089	885564	-283681	C	SD4733|NA:0-0|NA	Unknown	-3	1011	536 3	14
8288	27	0	0.1	H1	886257	887522	-281723	C	SD2832|NA:0-0|NA	Unknown	-101	1265	1 3	15
1593	15	0	0	H1	887522	887734	-281511	C	SD2830|chr17:41945055-41945267|q21.31	Unknown	0	213	1 3	16	*
4906	1.6	0	0.5	H1	887734	888292	-280953	C	SD2829|NA:0-0|NA	Unknown	0	556	1 3	17
1828	0	0	0	H1	888292	888486	-280759	C	SD2825|chr17:40982860-40983054|q21.31	Unknown	0	195	1 3	18	*
5887	13.8	1.5	0.6	H1	888469	889398	-279847	C	SD2819|chr17:34438239-34440020|q12	Unknown	-471	938	1 3	19
702	31.4	1.3	2.4	H1	889142	889441	-279804	C	SD2828|chr17:63658228-63658535|q24.2	Unknown	-9	299	3 3	20	*
581	5.6	0	0	H1	889398	889469	-279776	C	SD2821|NA:0-0|NA	Unknown	0	506	435 3	21	*
762	11.9	0	2.5	H1	889465	889585	-279660	C	SD3958|NA:0-0|NA	Unknown	-3	245	128 3	22	*
2645	3.9	0	0	H1	889511	889819	-279426	C	SD2826|NA:0-0|NA	Unknown	0	309	1 3	23
2277	0	0	0	H1	889819	890066	-279179	C	SD3958|NA:0-0|NA	Unknown	0	248	1 3	24	*
3609	1.2	0	0.2	H1	890066	890470	-278775	C	SD3957|chr17:40980876-40981280|q21.31	Unknown	0	404	1 3	25
1686	1	0	0	H1	890470	890667	-278578	C	SD4709|chr17:40980679-40980876|q21.31	Unknown	0	198	1 3	26	*
550	6	0	13.7	H1	890648	890763	-278482	C	SD4739|NA:0-0|NA	Unknown	0	116	15 3	27	*
1383	55.3	0	0	H1	890763	891156	-278089	C	SD4736|NA:0-0|NA	Unknown	0	394	1 3	28
973	0	0	0	H1	891489	891597	-277648	C	SD4631|chr17:40979750-40979858|q21.31	Unknown	0	109	1 3	29
913	0	0	0	H1	891639	891739	-277506	C	SD5900|chr17:40979537-40979708|q21.31	Unknown	0	172	72 3	30
7923	29.4	0	1.1	H1	891867	893206	-276039	C	SD5898|chr17:41949332-41951184|q21.31	Unknown	-57	1776	452 3	31
1302	0	0	0	H1	893931	894075	-275170	C	SD5897|NA:0-0|NA	Unknown	-277	342	198 3	32
3108	9.4	0	1	H1	894865	895262	-273983	C	SD4639|NA:0-0|NA	Unknown	-428	394	1 3	33
1819	1.9	0	0	H1	895262	895466	-273779	C	SD4641|chr17:40975884-40976088|q21.31	Unknown	0	205	1 3	34	*
1602	31	0	0.4	H1	895466	895737	-273508	C	SD4642|chr17:40975429-40975884|q21.31	Unknown	0	454	184 3	35	*
3471	8.2	0.2	0	H1	895924	896349	-272896	C	SD4643|chr17:31317463-31318213|q12	Unknown	0	427	1 3	36
2126	0.4	0	0	H1	896349	896579	-272666	C	SD4644|chr17:34450552-34450787|q12	Unknown	0	231	1 3	37	*
3207	0.6	0	0	H1	896730	897085	-272160	C	SD4646|chr17:34450804-34451435|q12	Unknown	-134	495	140 3	38
3011	3.3	0.3	0.3	H1	897224	897586	-271659	C	SD4647|chr17:34451435-34451896|q12	Unknown	0	363	1 3	39
2658	3.8	1.1	3.2	H1	897898	898247	-270998	C	SD1764|chr17:41955428-41955777|q21.31	Unknown	0	343	1 3	40
6720	23.3	0.3	0.2	H1	898249	899288	-269957	C	SD1762|chr17:41955779-41956818|q21.31	Unknown	0	1041	1 3	41
1023	1.6	4.9	0.8	H1	899457	899579	-269666	C	SD1761|NA:0-0|NA	Unknown	-169	431	304 3	42
4907	0.6	0	0.2	H1	899929	900462	-268783	+	SD1760|NA:0-0|NA	Unknown	12	544	(184) 3	43
32998	26.6	0.1	0.1	H1	900769	905772	-263473	+	SD4606|chr17:41958254-41964774|q21.31	Unknown	55	5057	(1408) 3	44
1667	0	0	0	H1	906828	907008	-262237	+	SD4606|chr17:41958254-41964774|q21.31	Unknown	6112	6292	(173) 3	45
1426	45.2	0	0	H1	912708	913021	-256224	+	SD4607|NA:0-0|NA	Unknown	2769	3082	(404) 3	46
1993	37.1	0.9	0.7	H1	913427	913857	-255388	+	SD4602|NA:0-0|NA	Unknown	1	432	(781) 3	47
2236	50	0	4.6	H1	914183	914821	-254424	+	SD4602|NA:0-0|NA	Unknown	603	1213	(0) 3	48
6065	4.9	0.9	1.3	H1	914823	915606	-253639	+	SD4603|chr17:41972641-41973690|q21.31	Unknown	3	783	(286) 3	49
2054	10.5	7.4	3.3	H1	915400	915804	-253441	+	SD4603|chr17:41972641-41973690|q21.31	Unknown	583	1003	(66) 3	50	*
4368	3.7	1	0.2	H1	917604	918121	-251124	C	SD7757|chr17:41974749-41975947|q21.31	Unknown	-683	523	2 3	51
990	0.9	0	0	H1	918124	918233	-251012	C	SD1785|chr17:41975947-41976096|q21.31	Unknown	0	150	41 3	52
4465	48.2	0	0.7	H1	918612	919701	-249544	+	SD1787|chr17:40953832-40957413|q21.31	Unknown	339	1421	(2143) 3	53
10267	2.9	0.8	0.8	H1	920652	921849	-247396	+	SD1787|chr17:40953832-40957413|q21.31	Unknown	2366	3564	(0) 3	54
3901	18.6	0.7	1.4	H1	921851	922418	-246827	+	SD1732|chr17:40953270-40953832|q21.31	Unknown	3	566	(0) 3	55
2956	2.7	0	0.3	H1	922418	922756	-246489	+	SD1733|chr17:40952932-40953270|q21.31	Unknown	1	338	(0) 3	56	*
3637	1	0	0.2	H1	922762	923162	-246083	+	SD1734|chr17:40952521-40952932|q21.31	Unknown	3	402	(0) 3	57
2176	3.2	0	0	H1	923176	923422	-245823	+	SD1737|NA:0-0|NA	Unknown	3	249	(0) 3	58	*
10918	3.2	0	0	H1	923422	924693	-244552	+	SD1738|NA:0-0|NA	Unknown	1	1272	(0) 3	59
1744	1.1	0	0	H1	924693	924883	-244362	+	SD1740|chr17:40946714-40947017|q21.31	Unknown	1	191	(111) 3	60	*
10682	2.1	1	0.8	H1	925181	926412	-242833	+	SD1669|NA:0-0|NA	Unknown	188	1421	(0) 3	61
226	27.2	6.7	4.7	H1	926361	926464	-242781	+	SD7430|NA:0-0|NA	Unknown	304	409	(103) 3	62	*
700	1.3	0	0	H1	926450	926527	-242718	+	SD1742|NA:0-0|NA	Unknown	1	78	(206) 3	63
2330	4.4	0.3	4.3	H1	927354	927665	-241580	+	SD1744|chr17:41984811-41985794|q21.31	Unknown	348	647	(275) 3	64
384	9.6	0	0	H1	927901	927952	-241293	+	SD1744|chr17:41984811-41985794|q21.31	Unknown	852	903	(19) 3	65
1342	5.4	0	0	H1	928092	928257	-240988	+	SD1745|chr17:40943443-40943730|q21.31	Unknown	123	288	(0) 3	66
1018	63.2	1	0	H1	928257	928642	-240603	+	SD1746|chr17:41986081-41986466|q21.31	Unknown	1	390	(0) 3	67	*
3395	0	1.6	0	H1	928642	929014	-240231	+	SD1748|NA:0-0|NA	Unknown	1	379	(94) 3	68
6842	12.2	0	0.8	H1	929304	930166	-239079	+	SD4715|chr17:42485778-42486665|q21.32	Unknown	33	888	(0) 3	69
2847	2.2	0	0	H1	930166	930486	-238759	+	SD4714|chr17:42486665-42486991|q21.32	Unknown	1	321	(0) 3	70	*
4156	1.5	0.2	0.2	H1	930486	930965	-238280	+	SD4710|NA:0-0|NA	Unknown	1	480	(648) 3	71
276	0	0	0	H1	931919	931955	-237290	+	SD4708|chr17:40935939-40937275|q21.31	Unknown	307	343	(1005) 3	72
3717	1.2	0.2	0	H1	932502	932911	-236334	+	SD4708|chr17:40935939-40937275|q21.31	Unknown	890	1300	(48) 3	73
414	2.1	0	0	H1	933551	933597	-235648	+	SD4706|NA:0-0|NA	Unknown	54	100	(89) 3	74
658	0	0	0	H1	933749	933820	-235425	+	SD4705|NA:0-0|NA	Unknown	101	172	(0) 3	75	*
7589	13	0	0	H1	933820	934824	-234421	+	SD4704|chr17:40933996-40935001|q21.31	Unknown	1	1005	(0) 3	76
7023	28.2	0	0	H1	934901	935990	-233255	C	SD5728|chr17:40932839-40933919|q21.31	Unknown	0	1090	1 3	77
1186	46.3	0	0	H1	935990	936259	-232986	C	SD5727|chr17:40930180-40932839|q21.31	Unknown	0	2669	2400 3	78	*
3565	60.1	0.3	0	H1	937146	938304	-230941	C	SD5727|chr17:40930180-40932839|q21.31	Unknown	-1156	1513	352 3	79
317	0	0	0	H1	938777	938815	-230430	C	SD5726|chr17:40929959-40930179|q21.31	Unknown	-121	97	59 3	80
1370	0	0	1.3	H1	938923	939083	-230162	C	SD5724|chr17:40929748-40929958|q21.31	Unknown	-49	159	1 3	81
292	0	0	0	H1	939083	939114	-230131	C	SD5725|chr17:40928985-40929748|q21.31	Unknown	0	766	735 3	82	*
1131	0.8	0	0	H1	939485	939607	-229638	C	SD5725|chr17:40928985-40929748|q21.31	Unknown	-402	364	242 3	83
1412	0	0	0	H1	939963	940121	-229124	C	SD5732|chr17:41997758-41999999|q21.31	Unknown	-115	2127	1969 3	84
5357	43	0	0	H1	940716	941826	-227419	C	SD5732|chr17:41997758-41999999|q21.31	Unknown	-868	1374	264 3	85
514	0	0	0	H1	943057	943113	-226132	C	SD4692|NA:0-0|NA	Unknown	-966	138477	138421 3	86
3364	17.6	0	0	H1	944194	944660	-224585	C	SD4692|NA:0-0|NA	Unknown	-2103	137340	136874 3	87
5450	43.6	0	0	H1	945379	946513	-222732	C	SD4692|NA:0-0|NA	Unknown	-3288	136155	135021 3	88
4998	50.5	0	0	H1	947008	948332	-220913	C	SD4692|NA:0-0|NA	Unknown	-4917	134526	133202 3	89
389	0	0	0	H1	948924	948977	-220268	C	SD4692|NA:0-0|NA	Unknown	-6833	132610	132557 3	90
11363	49.5	0	0	H1	949452	952360	-216885	C	SD4692|NA:0-0|NA	Unknown	-7361	132082	129174 3	91
18918	27.2	0	0	H1	952880	955969	-213276	C	SD4692|NA:0-0|NA	Unknown	-10789	128654	125565 3	92
246	0	0	0	H1	956280	956309	-212936	C	SD4692|NA:0-0|NA	Unknown	-14189	125254	125225 3	93
3460	40.4	0	0	H1	956856	957602	-211643	C	SD4692|NA:0-0|NA	Unknown	-14765	124678	123932 3	94
51135	24.5	0	0.1	H1	958660	966627	-202618	C	SD4692|NA:0-0|NA	Unknown	-16561	122882	114921 3	95
1793	0.5	0	0	H1	967674	967879	-201366	C	SD4692|NA:0-0|NA	Unknown	-25569	113874	113669 3	96
801	0	0	0	H1	968875	968966	-200279	C	SD4692|NA:0-0|NA	Unknown	-26770	112673	112582 3	97
2012	23.2	0	0	H1	969889	970203	-199042	C	SD4692|NA:0-0|NA	Unknown	-27784	111659	111345 3	98
11724	7.9	0	0	H1	972872	974368	-194877	C	SD4692|NA:0-0|NA	Unknown	-30765	108678	107182 3	99
338	0	0	0	H1	975355	975394	-193851	C	SD4692|NA:0-0|NA	Unknown	-33247	106196	106157 4	0
10527	26.6	0	0	H1	976639	978402	-190843	C	SD4692|NA:0-0|NA	Unknown	-34531	104912	103149 4	1
2043	0	0	0	H1	978911	979144	-190101	C	SD4692|NA:0-0|NA	Unknown	-36803	102640	102407 4	2
252	0	0	0	H1	981111	981144	-188101	C	SD4692|NA:0-0|NA	Unknown	-39003	100440	100407 4	3
1361	35.7	0	0	H1	981979	982247	-186998	C	SD4692|NA:0-0|NA	Unknown	-39871	99572	99304 4	4
264	0	0	0	H1	982691	982720	-186525	C	SD4692|NA:0-0|NA	Unknown	-40583	98860	98831 4	5
3604	40.9	0	0	H1	983793	984575	-184670	C	SD4692|NA:0-0|NA	Unknown	-41685	97758	96976 4	6
3680	14.5	0	0	H1	985063	985567	-183678	C	SD4692|NA:0-0|NA	Unknown	-42910	96533	96029 4	7
9018	51.3	0	0	H1	988452	990913	-178332	C	SD4692|NA:0-0|NA	Unknown	-46298	93145	90684 4	8
15727	32.4	0	0	H1	991455	994268	-174977	C	SD4692|NA:0-0|NA	Unknown	-49301	90142	87329 4	9
250	0	0	0	H1	995064	995094	-174151	C	SD4692|NA:0-0|NA	Unknown	-52910	86533	86503 4	10
297	0	0	0	H1	995901	995934	-173311	C	SD4692|NA:0-0|NA	Unknown	-53744	85699	85666 4	11
332	0	0	0	H1	996720	996758	-172487	C	SD4692|NA:0-0|NA	Unknown	-54562	84881	84843 4	12
26657	31.7	0	0.1	H1	997695	1002494	-166751	C	SD4692|NA:0-0|NA	Unknown	-55533	83910	79114 4	13
13486	22.7	0	0.1	H1	1000495	1002508	-166737	C	SD4692|NA:0-0|NA	Unknown	-58332	81111	79100 4	14	*
29257	46.8	0	0.2	H1	1003130	1009899	-159346	C	SD4692|NA:0-0|NA	Unknown	-60965	78478	71725 4	15
16651	24.9	0	0.3	H1	1010514	1013088	-156157	C	SD4692|NA:0-0|NA	Unknown	-68333	71110	68544 4	16
13806	15.4	0	0	H1	1013859	1015716	-153529	C	SD4692|NA:0-0|NA	Unknown	-71670	67773	65916 4	17
78319	17.1	0	0	H1	1016169	1026876	-142369	C	SD4692|NA:0-0|NA	Unknown	-73980	65463	54757 4	18
55723	24.8	0	0.1	H1	1027545	1036112	-133133	C	SD4692|NA:0-0|NA	Unknown	-85355	54088	45533 4	19
523	0	0	0	H1	1036939	1036998	-132247	C	SD4692|NA:0-0|NA	Unknown	-94737	44706	44647 4	20
25324	35.5	0	0	H1	1037556	1042166	-127079	C	SD4692|NA:0-0|NA	Unknown	-95354	44089	39481 4	21
19904	12.6	0	0	H1	1042949	1045482	-123763	C	SD4692|NA:0-0|NA	Unknown (	100745)	38698	36165 4	22
26790	33.4	0	0.2	H1	1045943	1050682	-118563	C	SD4692|NA:0-0|NA	Unknown (	103739)	35704	30973 4	23
708	62.5	0	0	H1	1051381	1051636	-117609	C	SD4692|NA:0-0|NA	Unknown (	109155)	30288	30033 4	24
2359	60.8	0	0	H1	1053914	1054763	-114482	C	SD4692|NA:0-0|NA	Unknown (	111686)	27757	26908 4	25
3352	0	0	1.1	H1	1056121	1056504	-112741	C	SD4692|NA:0-0|NA	Unknown (	113893)	25550	25171 4	26
20474	16.6	0	0	H1	1059713	1062508	-106737	C	SD4692|NA:0-0|NA	Unknown (	117481)	21962	19167 4	27
4768	37.8	0	0	H1	1063067	1063995	-105250	C	SD4692|NA:0-0|NA	Unknown (	120835)	18608	17680 4	28
60985	35.9	0	0	H1	1065194	1076517	-92728	C	SD4692|NA:0-0|NA	Unknown (	122962)	16481	5161 4	29
4781	22.4	0	0	H1	1076978	1077694	-91551	C	SD4692|NA:0-0|NA	Unknown (	134743)	4700	3984 4	30
6211	28.1	0	0	H1	1079189	1080197	-89048	C	SD4692|NA:0-0|NA	Unknown (	136954)	2489	1481 4	31
331	0	0	9.1	H1	1081678	1081725	-87520	C	SD4690|NA:0-0|NA	Unknown	-1	1245	1202 4	32
2300	54.4	0	0.1	H1	1082055	1082707	-86538	C	SD4690|NA:0-0|NA	Unknown	-345	901	250 4	33
1183	1.3	0	7.3	H1	1083007	1083168	-86077	C	SD4690|NA:0-0|NA	Unknown	-985	261	111 4	34
3914	5.4	0	0.4	H1	1083463	1083945	-85300	C	SD4740|NA:0-0|NA	Unknown	-165	1239	759 4	35
385	0	0	0	H1	1084533	1084582	-84663	C	SD4740|NA:0-0|NA	Unknown	-1233	171	122 4	36
1434	1.2	0	0	H1	1086812	1086976	-82269	C	SD4744|NA:0-0|NA	Unknown	-1298	3079	2915 4	37
395	62	0	0	H1	1089304	1089495	-79750	C	SD4744|NA:0-0|NA	Unknown	-3482	895	704 4	38
1507	0.6	0	0	H1	1090033	1090208	-79037	C	SD4744|NA:0-0|NA	Unknown	-4199	178	3 4	39
1898	1.8	0	0	H1	1090572	1090792	-78453	C	SD4745|NA:0-0|NA	Unknown	-63	609	389 4	40
10681	17.6	0.2	0.3	H1	1091603	1093099	-76146	C	SD4747|chr17:63274100-63276169|q24.2	Unknown	-175	1498	3 4	41
6828	0.5	0.4	0.1	H1	1093742	1094509	-74736	C	SD4750|chr17:40993921-40995104|q21.31	Unknown	-406	770	1 4	42
6899	36.1	0.1	0	H1	1094869	1096163	-73082	C	SD4752|chr17:40992269-40993849|q21.31	Unknown	-284	1297	1 4	43	*
8440	0	0	0	H1	1096163	1097079	-72166	C	SD4753|NA:0-0|NA	Unknown	0	917	1 4	44
1773	58.9	0	0	H1	1097501	1098074	-71171	C	SD4755|chr17:41937916-41938497|q21.31	Unknown	0	582	9 4	45
2040	0	0	0	H1	1098369	1098591	-70654	C	SD4756|chr17:41938505-41939014|q21.31	Unknown	-279	231	9 4	46
10581	18	0	0	H1	1099152	1100594	-68651	C	SD4748|chr17:41939022-41941009|q21.31	Unknown	-545	1443	1 4	47
5660	9.9	1.1	1.1	H1	1100253	1101068	-68177	+	SD8043|chr17:31271041-31272719|q12	Unknown	1	816	(830) 4	48	*
4204	36.4	0	0.9	H1	1100594	1101405	-67840	C	SD4731|chr17:27368175-27368990|q11.2	Unknown	0	805	1 4	49	*
2045	7.7	0.7	0	H1	1101362	1101634	-67611	+	SD8043|chr17:31271041-31272719|q12	Unknown	1140	1414	(232) 4	50	*
4318	0.8	0	0	H1	1102202	1102677	-66568	C	SD4733|NA:0-0|NA	Unknown	-3	1011	536 4	51
8146	26.8	0	0.1	H1	1103375	1104640	-64605	C	SD2832|NA:0-0|NA	Unknown	-101	1265	1 4	52
1558	15	0	0	H1	1104640	1104852	-64393	C	SD2830|chr17:41945055-41945267|q21.31	Unknown	0	213	1 4	53	*
4763	2.2	0	0.5	H1	1104852	1105410	-63835	C	SD2829|NA:0-0|NA	Unknown	0	556	1 4	54
1789	0	0	0	H1	1105410	1105604	-63641	C	SD2825|chr17:40982860-40983054|q21.31	Unknown	0	195	1 4	55	*
5777	13.8	1.5	0.6	H1	1105587	1106516	-62729	C	SD2819|chr17:34438239-34440020|q12	Unknown	-471	938	1 4	56
688	31.4	1.3	2.4	H1	1106260	1106559	-62686	C	SD2828|chr17:63658228-63658535|q24.2	Unknown	-9	299	3 4	57	*
571	5.6	0	0	H1	1106516	1106587	-62658	C	SD2821|NA:0-0|NA	Unknown	0	506	435 4	58	*
746	11.9	0	2.5	H1	1106583	1106703	-62542	C	SD3958|NA:0-0|NA	Unknown	-3	245	128 4	59	*
2592	3.9	0	0	H1	1106629	1106937	-62308	C	SD2826|NA:0-0|NA	Unknown	0	309	1 4	60
2228	0	0	0	H1	1106937	1107184	-62061	C	SD3958|NA:0-0|NA	Unknown	0	248	1 4	61	*
3517	1.5	0	0.2	H1	1107184	1107588	-61657	C	SD3957|chr17:40980876-40981280|q21.31	Unknown	0	404	1 4	62
1659	1	0	0	H1	1107588	1107785	-61460	C	SD4709|chr17:40980679-40980876|q21.31	Unknown	0	198	1 4	63	*
534	6	0	13.7	H1	1107766	1107881	-61364	C	SD4739|NA:0-0|NA	Unknown	0	116	15 4	64	*
1369	55.1	0	0	H1	1107881	1108274	-60971	C	SD4736|NA:0-0|NA	Unknown	0	394	1 4	65
949	0	0	0	H1	1108596	1108704	-60541	C	SD4631|chr17:40979750-40979858|q21.31	Unknown	0	109	1 4	66
512	3.2	0	0	H1	1108746	1108807	-60438	C	SD5900|chr17:40979537-40979708|q21.31	Unknown	0	172	111 4	67
7911	26.6	0	1.7	H1	1108974	1110321	-58924	C	SD5898|chr17:41949332-41951184|q21.31	Unknown	-57	1776	452 4	68
1249	0.7	0	0	H1	1111046	1111190	-58055	C	SD5897|NA:0-0|NA	Unknown	-277	342	198 4	69
3204	2.1	0	0	H1	1112001	1112375	-56870	C	SD4639|NA:0-0|NA	Unknown	-447	375	1 4	70
1771	1.9	0	0	H1	1112375	1112579	-56666	C	SD4641|chr17:40975884-40976088|q21.31	Unknown	0	205	1 4	71	*
1635	30.3	0	0.4	H1	1112579	1112850	-56395	C	SD4642|chr17:40975429-40975884|q21.31	Unknown	0	454	184 4	72	*
3486	8.4	0	0	H1	1113037	1113463	-55782	C	SD4643|chr17:31317463-31318213|q12	Unknown	0	427	1 4	73
2094	1.3	0	0	H1	1113463	1113693	-55552	C	SD4644|chr17:34450552-34450787|q12	Unknown	0	231	1 4	74	*
3528	1.3	0	0	H1	1113804	1114200	-55045	C	SD4646|chr17:34450804-34451435|q12	Unknown	-93	536	140 4	75
3045	2.8	0.3	0.3	H1	1114339	1114701	-54544	C	SD4647|chr17:34451435-34451896|q12	Unknown	0	363	1 4	76
2645	4.1	1.1	3.2	H1	1115013	1115362	-53883	C	SD1764|chr17:41955428-41955777|q21.31	Unknown	0	343	1 4	77
6751	23.1	0.3	0.2	H1	1115364	1116403	-52842	C	SD1762|chr17:41955779-41956818|q21.31	Unknown	0	1041	1 4	78
1040	0.8	4.9	0.8	H1	1116572	1116694	-52551	C	SD1761|NA:0-0|NA	Unknown	-169	431	304 4	79
4900	0.6	0	0.2	H1	1117044	1117577	-51668	+	SD1760|NA:0-0|NA	Unknown	12	544	(184) 4	80
32919	26.6	0.2	0	H1	1117915	1122897	-46348	+	SD4606|chr17:41958254-41964774|q21.31	Unknown	68	5057	(1408) 4	81
1667	0	0	0	H1	1123953	1124133	-45112	+	SD4606|chr17:41958254-41964774|q21.31	Unknown	6112	6292	(173) 4	82
1426	45.2	0	0	H1	1130113	1130426	-38819	+	SD4607|NA:0-0|NA	Unknown	2769	3082	(404) 4	83
2034	36.7	0.9	0.7	H1	1130832	1131262	-37983	+	SD4602|NA:0-0|NA	Unknown	1	432	(781) 4	84
2236	50	0	4.6	H1	1131588	1132226	-37019	+	SD4602|NA:0-0|NA	Unknown	603	1213	(0) 4	85
6069	4.9	0.9	1.3	H1	1132228	1133011	-36234	+	SD4603|chr17:41972641-41973690|q21.31	Unknown	3	783	(286) 4	86
2069	10.2	7.4	3.3	H1	1132805	1133209	-36036	+	SD4603|chr17:41972641-41973690|q21.31	Unknown	583	1003	(66) 4	87	*
4344	3.9	1	0.2	H1	1135012	1135529	-33716	C	SD7757|chr17:41974749-41975947|q21.31	Unknown	-683	523	2 4	88
1004	0	0	0	H1	1135532	1135641	-33604	C	SD1785|chr17:41975947-41976096|q21.31	Unknown	0	150	41 4	89
4476	48.1	0	0.7	H1	1136020	1137109	-32136	+	SD1787|chr17:40953832-40957413|q21.31	Unknown	339	1421	(2143) 4	90
10356	2.9	0.4	0.8	H1	1138062	1139264	-29981	+	SD1787|chr17:40953832-40957413|q21.31	Unknown	2366	3564	(0) 4	91
3889	18.6	0.7	1.8	H1	1139266	1139835	-29410	+	SD1732|chr17:40953270-40953832|q21.31	Unknown	3	566	(0) 4	92
2956	2.7	0	0.3	H1	1139835	1140173	-29072	+	SD1733|chr17:40952932-40953270|q21.31	Unknown	1	338	(0) 4	93	*
3637	1	0	0.2	H1	1140179	1140579	-28666	+	SD1734|chr17:40952521-40952932|q21.31	Unknown	3	402	(0) 4	94
2176	3.2	0	0	H1	1140593	1140839	-28406	+	SD1737|NA:0-0|NA	Unknown	3	249	(0) 4	95	*
10974	2.9	0	0	H1	1140839	1142110	-27135	+	SD1738|NA:0-0|NA	Unknown	1	1272	(0) 4	96
1744	1.1	0	0	H1	1142110	1142300	-26945	+	SD1740|chr17:40946714-40947017|q21.31	Unknown	1	191	(111) 4	97	*
10557	1.8	1.8	0.8	H1	1142598	1143819	-25426	+	SD1669|NA:0-0|NA	Unknown	188	1421	(0) 4	98
226	27.2	6.7	4.7	H1	1143768	1143871	-25374	+	SD7430|NA:0-0|NA	Unknown	304	409	(103) 4	99	*
720	0	0	0	H1	1143857	1143934	-25311	+	SD1742|NA:0-0|NA	Unknown	1	78	(206) 5	0
2324	4.3	0.3	4.7	H1	1144761	1145073	-24172	+	SD1744|chr17:41984811-41985794|q21.31	Unknown	348	647	(275) 5	1
384	9.6	0	0	H1	1145310	1145361	-23884	+	SD1744|chr17:41984811-41985794|q21.31	Unknown	852	903	(19) 5	2
1350	5.4	0	0	H1	1145501	1145666	-23579	+	SD1745|chr17:40943443-40943730|q21.31	Unknown	123	288	(0) 5	3
1018	63.2	1	0	H1	1145666	1146051	-23194	+	SD1746|chr17:41986081-41986466|q21.31	Unknown	1	390	(0) 5	4	*
3496	0	0.3	0	H1	1146051	1146428	-22817	+	SD1748|NA:0-0|NA	Unknown	1	379	(94) 5	5
6865	12	0	0.8	H1	1146718	1147580	-21665	+	SD4715|chr17:42485778-42486665|q21.32	Unknown	33	888	(0) 5	6
2871	1.9	0	0	H1	1147580	1147900	-21345	+	SD4714|chr17:42486665-42486991|q21.32	Unknown	1	321	(0) 5	7	*
4168	1.2	0.2	0.2	H1	1147900	1148379	-20866	+	SD4710|NA:0-0|NA	Unknown	1	480	(648) 5	8
276	0	0	0	H1	1149333	1149369	-19876	+	SD4708|chr17:40935939-40937275|q21.31	Unknown	307	343	(1005) 5	9
3657	1.5	0.2	0	H1	1149916	1150320	-18925	+	SD4708|chr17:40935939-40937275|q21.31	Unknown	890	1295	(53) 5	10
1195	2.9	0	0	H1	1150958	1151093	-18152	+	SD4706|NA:0-0|NA	Unknown	54	189	(0) 5	11
658	0	0	0	H1	1151244	1151315	-17930	+	SD4705|NA:0-0|NA	Unknown	101	172	(0) 5	12	*
7611	12.9	0	0	H1	1151315	1152319	-16926	+	SD4704|chr17:40933996-40935001|q21.31	Unknown	1	1005	(0) 5	13
7023	28.2	0	0	H1	1152396	1153485	-15760	C	SD5728|chr17:40932839-40933919|q21.31	Unknown	0	1090	1 5	14
1186	46.3	0	0	H1	1153485	1153754	-15491	C	SD5727|chr17:40930180-40932839|q21.31	Unknown	0	2669	2400 5	15	*
3565	60.1	0.3	0	H1	1154641	1155799	-13446	C	SD5727|chr17:40930180-40932839|q21.31	Unknown	-1156	1513	352 5	16
317	0	0	0	H1	1156272	1156310	-12935	C	SD5726|chr17:40929959-40930179|q21.31	Unknown	-121	97	59 5	17
1370	0	0	1.3	H1	1156418	1156578	-12667	C	SD5724|chr17:40929748-40929958|q21.31	Unknown	-49	159	1 5	18
292	0	0	0	H1	1156578	1156609	-12636	C	SD5725|chr17:40928985-40929748|q21.31	Unknown	0	766	735 5	19	*
1131	0.8	0	0	H1	1156980	1157102	-12143	C	SD5725|chr17:40928985-40929748|q21.31	Unknown	-402	364	242 5	20
1412	0	0	0	H1	1157458	1157616	-11629	C	SD5732|chr17:41997758-41999999|q21.31	Unknown	-115	2127	1969 5	21
5357	43	0	0	H1	1158211	1159321	-9924	C	SD5732|chr17:41997758-41999999|q21.31	Unknown	-868	1374	264 5	22
514	0	0	0	H1	1160552	1160608	-8637	C	SD4692|NA:0-0|NA	Unknown	-966	138477	138421 5	23
3378	17.3	0	0	H1	1161693	1162159	-7086	C	SD4692|NA:0-0|NA	Unknown	-2103	137340	136874 5	24
16111	37.1	0	0	H1	1162878	1165831	-3414	C	SD4692|NA:0-0|NA	Unknown	-3288	136155	133202 5	25
419	0	0	0	H1	1166423	1166476	-2769	C	SD4692|NA:0-0|NA	Unknown	-6833	132610	132557 5	26
9597	49.8	0	0	H1	1166951	1169245	0	C	SD4692|NA:0-0|NA	Unknown	-7361	132082	129788 5	27
