# Supplementary material for: Primate segmental duplication creates novel promoters for theLRRC37gene family within the 17q21.31 inversion polymorphism region
Source: HighWire-hosted journal article supplement (doi:10.1101/gr.134098.111), 2012-03-14
Supplement: Supplementary_Table_2.xlsx [file Supplementary_Table_2.xlsx]

## Sheet: H2.txt
SW score	Perc div.	Perc del.	Perc ins.	Query sequence	Query Position Begin	Query Position End	Query Position repeat (left)		Matching repeat	Repeat class/family	Position Begin	Position End	Position repeat (left)	ID
319	29.8	0	1.5	H2	29841	29973	-1451080	C	SD2547|chr22:21977479-21981183|q11.23	Unknown	-1402	2301	2171	1
433	1.9	0	0	H2	35306	35359	-1445694	C	SD5723|chr17:40834508-40836121|q21.31	Unknown	-81	1512	1459	2
6372	15.1	0	1.1	H2	35873	36838	-1444215	C	SD5723|chr17:40834508-40836121|q21.31	Unknown	-638	955	1	3
990	6.1	0	3.4	H2	48947	49099	-1431954	+	SD4689|chr17:40848076-40860828|q21.31	Unknown	160	307	-11224	4
1684	28.4	0	0.2	H2	49101	49646	-1431407	+	SD4689|chr17:40848076-40860828|q21.31	Unknown	756	1300	-10231	5
7487	27.9	0	1.9	H2	51919	53305	-1427748	+	SD4689|chr17:40848076-40860828|q21.31	Unknown	2341	3701	-7830	6
3020	31.2	0	0.5	H2	53887	54520	-1426533	+	SD4689|chr17:40848076-40860828|q21.31	Unknown	4293	4923	-6608	7
3501	38.7	0	1.1	H2	54820	55648	-1425405	+	SD4689|chr17:40848076-40860828|q21.31	Unknown	4916	5735	-5796	8
8060	33	0	1.2	H2	57138	58739	-1422314	+	SD4689|chr17:40848076-40860828|q21.31	Unknown	7214	8796	-2735	9
2169	5.9	0	5.6	H2	58674	59030	-1422023	+	SD4689|chr17:40848076-40860828|q21.31	Unknown	8731	9068	-2463	10	*
16622	13	0	0.2	H2	59056	61491	-1419562	+	SD4689|chr17:40848076-40860828|q21.31	Unknown	9064	11493	-38	11
822	42	6.5	3.1	H2	61429	61797	-1419256	+	SD2041|NA:0-0|NA	Unknown	2090	2470	-905	12	*
3070	3.9	0.5	3.2	H2	61587	62034	-1419019	+	SD4687|chr17:40860831-40861335|q21.31	Unknown	73	508	-2	13
4534	50.5	0.2	0.6	H2	62037	63454	-1417599	+	SD5741|chr17:40861335-40866975|q21.31	Unknown	2	1413	-4023	14
8378	14.1	0.3	3	H2	63472	64939	-1416114	+	SD5741|chr17:40861335-40866975|q21.31	Unknown	1400	2829	-2607	15
8353	10.7	1.4	3.7	H2	64862	66371	-1414682	+	SD5741|chr17:40861335-40866975|q21.31	Unknown	2751	4227	-1209	16	*
9991	9.2	0.7	1.6	H2	65880	67437	-1413616	+	SD5741|chr17:40861335-40866975|q21.31	Unknown	3740	5283	-153	17
1317	4	1.1	1.1	H2	67455	67633	-1413420	+	SD5741|chr17:40861335-40866975|q21.31	Unknown	5258	5436	0	18
365	3.6	0	1.8	H2	67957	68012	-1413041	+	SD5740|chr17:40867319-40867750|q21.31	Unknown	1	55	-381	19
2652	27.7	0	6.8	H2	68530	69095	-1411958	+	SD5738|NA:0-0|NA	Unknown	143	672	0	20
14336	2.6	0	1.2	H2	69941	71826	-1409227	+	SD5743|chr17:40869303-40876117|q21.31	Unknown	1	1863	-4382	21
20752	18.2	0	0.5	H2	72644	75854	-1405199	+	SD5743|chr17:40869303-40876117|q21.31	Unknown	2365	5559	-686	22
1302	1.2	0	0	H2	76594	76755	-1404298	+	SD5743|chr17:40869303-40876117|q21.31	Unknown	6084	6245	0	23
11187	12.5	0.2	0.5	H2	76756	78375	-1402678	+	SD5721|chr17:40876118-40879131|q21.31	Unknown	1	1615	-1382	24
3840	39.7	0.5	0	H2	78919	79765	-1401288	+	SD5721|chr17:40876118-40879131|q21.31	Unknown	2147	2997	0	25
7614	36	0	0.9	H2	79824	81405	-1399648	+	SD4728|chr17:40879189-40880936|q21.31	Unknown	1	1568	-141	26
1424	2.2	0	1.1	H2	81390	81570	-1399483	+	SD4728|chr17:40879189-40880936|q21.31	Unknown	1530	1708	-1	27	*
4685	40.5	0	1.4	H2	81895	82982	-1398071	+	SD4726|chr17:40881261-40882348|q21.31	Unknown	1	1073	0	28
232	0	0	17.1	H2	82982	83022	-1398031	+	SD4725|chr17:40882348-40898977|q21.31	Unknown	1	35	-16338	29	*
25033	23.7	0	0.1	H2	84125	88233	-1392820	+	SD4725|chr17:40882348-40898977|q21.31	Unknown	906	5012	-11361	30
4341	0.6	0	0	H2	90171	90688	-1390365	+	SD4725|chr17:40882348-40898977|q21.31	Unknown	6949	7466	-8907	31
268	0	0	0	H2	90987	91019	-1390034	+	SD4725|chr17:40882348-40898977|q21.31	Unknown	7763	7795	-8578	32
6025	0.1	0	0	H2	91540	92251	-1388802	+	SD4725|chr17:40882348-40898977|q21.31	Unknown	8315	9026	-7347	33
256	0	0	0	H2	93555	93585	-1387468	+	SD4725|chr17:40882348-40898977|q21.31	Unknown	10330	10360	-6013	34
20550	26.7	0	0.1	H2	95411	98895	-1382158	+	SD4725|chr17:40882348-40898977|q21.31	Unknown	12169	15650	-723	35
1672	3.3	0	0	H2	99738	99949	-1381104	+	SD4724|chr17:40898977-40899996|q21.31	Unknown	121	332	-689	36
16073	16.8	0	0.2	H2	101223	103583	-1377470	+	SD4723|chr17:40899996-40915562|q21.31	Unknown	587	2943	-12591	37
8898	9.4	0	0	H2	105578	106763	-1374290	+	SD4723|chr17:40899996-40915562|q21.31	Unknown	4933	6118	-9416	38
27226	37.3	0	0.1	H2	107250	112832	-1368221	+	SD4723|chr17:40899996-40915562|q21.31	Unknown	6605	12179	-3355	39
914	56.3	0	0.6	H2	113518	113862	-1367191	+	SD4723|chr17:40899996-40915562|q21.31	Unknown	12851	13193	-2341	40
7943	8.8	0	0.6	H2	115257	116206	-1364847	+	SD4723|chr17:40899996-40915562|q21.31	Unknown	14591	15534	0	41	*
10560	3.8	0.8	0.8	H2	116206	117425	-1363628	+	SD4722|chr17:40915562-40916781|q21.31	Unknown	1	1220	0	42
618	0	0	0	H2	117608	117678	-1363375	+	SD4721|chr17:40916800-40917305|q21.31	Unknown	165	235	-271	43
8418	0.2	0	0	H2	118506	119408	-1361645	+	SD4720|chr17:40917305-40920509|q21.31	Unknown	557	1459	-1410	44
6430	10.3	0	0	H2	120378	121153	-1359900	+	SD4720|chr17:40917305-40920509|q21.31	Unknown	2094	2869	0	45	*
10847	9.7	0	0	H2	121153	122442	-1358611	+	SD4719|chr17:40920509-40921798|q21.31	Unknown	1	1290	0	46
10574	0.3	0	0.1	H2	122766	123906	-1357147	+	SD4717|chr17:40922122-40923262|q21.31	Unknown	1	1140	0	47
9723	10	0	0.2	H2	123906	125164	-1355889	+	SD4702|chr17:40923262-40925416|q21.31	Unknown	1	1256	-897	48	*
2366	0.4	0	0	H2	125806	126062	-1354991	+	SD4702|chr17:40923262-40925416|q21.31	Unknown	1897	2153	0	49	*
12445	23.5	0	0.3	H2	126062	127890	-1353163	+	SD4703|chr17:40925416-40927453|q21.31	Unknown	1	1823	-198	50
1851	30.2	0	0.3	H2	128443	128748	-1352305	+	SD4701|chr17:40927456-40928393|q21.31	Unknown	354	658	-289	51
4803	0.4	0	0	H2	129061	129576	-1351477	+	SD4700|NA:0-0|NA	Unknown	23	538	-50	52
1147	0	0	0	H2	129872	129994	-1351059	+	SD5725|chr17:40928985-40929748|q21.31	Unknown	242	364	-402	53
298	0	0	0	H2	130364	130395	-1350658	+	SD5725|chr17:40928985-40929748|q21.31	Unknown	735	766	0	54	*
1366	1.3	0	1.3	H2	130395	130555	-1350498	+	SD5724|chr17:40929748-40929958|q21.31	Unknown	1	159	-49	55
296	0	0	0	H2	130667	130704	-1350349	+	SD5726|chr17:40929959-40930179|q21.31	Unknown	60	97	-121	56
3634	60.1	0	0	H2	131177	132338	-1348715	+	SD5727|chr17:40930180-40932839|q21.31	Unknown	352	1513	-1156	57
1170	46.7	0	0	H2	133226	133495	-1347558	+	SD5727|chr17:40930180-40932839|q21.31	Unknown	2400	2669	0	58	*
5553	41.2	0	0.2	H2	133495	134586	-1346467	+	SD5728|chr17:40932839-40933919|q21.31	Unknown	1	1090	0	59
7828	13	0	0	H2	134663	135667	-1345386	C	SD4704|chr17:40933996-40935001|q21.31	Unknown	0	1005	1	60
668	0	0	0	H2	135667	135738	-1345315	C	SD4705|NA:0-0|NA	Unknown	0	172	101	61	*
1199	2.9	0	0	H2	135887	136022	-1345031	C	SD4706|NA:0-0|NA	Unknown	0	189	54	62
3695	1.5	0.2	0	H2	136659	137063	-1343990	C	SD4708|chr17:40935939-40937275|q21.31	Unknown	-53	1295	890	63
269	0	0	0	H2	137610	137646	-1343407	C	SD4708|chr17:40935939-40937275|q21.31	Unknown	-1005	343	307	64
3253	20.5	0.2	0.2	H2	138600	139079	-1341974	C	SD4710|NA:0-0|NA	Unknown	-648	480	1	65
2886	1.9	0	0	H2	139079	139399	-1341654	C	SD4714|chr17:42486665-42486991|q21.32	Unknown	0	321	1	66	*
6039	13.5	0	0.4	H2	139399	140163	-1340890	C	SD4715|chr17:42485778-42486665|q21.32	Unknown	0	888	127	67
3525	0	0.3	0	H2	140551	140928	-1340125	C	SD1748|NA:0-0|NA	Unknown	-94	379	1	68
1019	63.2	1	0	H2	140928	141313	-1339740	C	SD1746|chr17:41986081-41986466|q21.31	Unknown	0	390	1	69	*
1328	5.4	0	0	H2	141313	141478	-1339575	C	SD1745|chr17:40943443-40943730|q21.31	Unknown	0	288	123	70
1733	4.1	0	1.4	H2	141906	142128	-1338925	C	SD1744|chr17:41984811-41985794|q21.31	Unknown	-275	647	428	71
725	0	0	0	H2	143044	143121	-1337932	C	SD1742|NA:0-0|NA	Unknown	-206	78	1	72
227	27.2	6.7	4.7	H2	143107	143210	-1337843	C	SD7430|NA:0-0|NA	Unknown	-103	409	304	73	*
10690	1.9	1.1	0.8	H2	143159	144389	-1336664	C	SD1669|NA:0-0|NA	Unknown	0	1421	188	74
1753	1.1	0	0	H2	144687	144877	-1336176	C	SD1740|chr17:40946714-40947017|q21.31	Unknown	-111	191	1	75	*
11034	3.1	0	0	H2	144877	146148	-1334905	C	SD1738|NA:0-0|NA	Unknown	0	1272	1	76
2138	4	0	0	H2	146148	146394	-1334659	C	SD1737|NA:0-0|NA	Unknown	0	249	3	77	*
3662	1	0	0.2	H2	146408	146808	-1334245	C	SD1734|chr17:40952521-40952932|q21.31	Unknown	0	402	3	78
2970	3	0	0.3	H2	146814	147152	-1333901	C	SD1733|chr17:40952932-40953270|q21.31	Unknown	0	338	1	79	*
3736	21.4	0.7	1.8	H2	147152	147721	-1333332	C	SD1732|chr17:40953270-40953832|q21.31	Unknown	0	566	3	80
10264	3.1	0.4	0.8	H2	147723	148925	-1332128	C	SD1787|chr17:40953832-40957413|q21.31	Unknown	0	3564	2366	81
4417	48.2	0	0.7	H2	149877	150966	-1330087	C	SD1787|chr17:40953832-40957413|q21.31	Unknown	-2143	1421	339	82
988	0	0	0	H2	151345	151454	-1329599	+	SD1785|chr17:41975947-41976096|q21.31	Unknown	41	150	0	83
4346	3.9	1	0.2	H2	151457	151974	-1329079	+	SD7757|chr17:41974749-41975947|q21.31	Unknown	2	523	-683	84
2005	10	7.4	3.3	H2	153777	154181	-1326872	C	SD4603|chr17:41972641-41973690|q21.31	Unknown	-66	1003	583	85	*
5972	4.8	0.9	1.3	H2	153975	154758	-1326295	C	SD4603|chr17:41972641-41973690|q21.31	Unknown	-286	783	3	86
1274	2.7	0	0	H2	154760	154907	-1326146	C	SD4602|NA:0-0|NA	Unknown	0	1213	1066	87
1390	1.9	0	0	H2	155246	155406	-1325647	C	SD4602|NA:0-0|NA	Unknown	-450	763	603	88
1837	37.8	1.2	0.7	H2	155735	156137	-1324916	C	SD4602|NA:0-0|NA	Unknown	-781	432	28	89
1407	45.2	0	0	H2	156570	156883	-1324170	C	SD4607|NA:0-0|NA	Unknown	-404	3082	2769	90
324	0	0	0	H2	157193	157227	-1323826	C	SD4607|NA:0-0|NA	Unknown	-1023	2463	2429	91
1643	0	0	0	H2	162863	163043	-1318010	C	SD4606|chr17:41958254-41964774|q21.31	Unknown	-173	6292	6112	92
30932	29.9	0.2	0.1	H2	164099	169083	-1311970	C	SD4606|chr17:41958254-41964774|q21.31	Unknown	-1408	5057	68	93
4871	0.6	0	0.2	H2	169421	169954	-1311099	C	SD1760|NA:0-0|NA	Unknown	-184	544	12	94
1039	0.8	4.9	0.8	H2	170304	170426	-1310627	+	SD1761|NA:0-0|NA	Unknown	304	431	-169	95
6623	22.9	0.4	0.2	H2	170595	171633	-1309420	+	SD1762|chr17:41955779-41956818|q21.31	Unknown	1	1041	0	96
2591	4.1	1.1	3.2	H2	171635	171984	-1309069	+	SD1764|chr17:41955428-41955777|q21.31	Unknown	1	343	0	97
2946	3	0.3	0.3	H2	172296	172658	-1308395	+	SD4647|chr17:34451435-34451896|q12	Unknown	1	363	0	98
1949	1.8	0	0	H2	172797	173022	-1308031	+	SD4646|chr17:34450804-34451435|q12	Unknown	140	365	-264	99
2071	0.4	0	0	H2	173303	173533	-1307520	+	SD4644|chr17:34450552-34450787|q12	Unknown	1	231	0	100	*
3384	8	0.2	0	H2	173533	173958	-1307095	+	SD4643|chr17:31317463-31318213|q12	Unknown	1	427	0	101
1576	30.6	0	0.4	H2	174145	174416	-1306637	+	SD4642|chr17:40975429-40975884|q21.31	Unknown	184	454	0	102	*
1772	1.9	0	0	H2	174416	174620	-1306433	+	SD4641|chr17:40975884-40976088|q21.31	Unknown	1	205	0	103	*
3346	1.8	0	0.5	H2	174620	175015	-1306038	+	SD4639|NA:0-0|NA	Unknown	1	394	-428	104
1261	0	0	0	H2	175805	175949	-1305104	+	SD5897|NA:0-0|NA	Unknown	198	342	-277	105
8114	25.3	0	1.6	H2	176674	178019	-1303034	+	SD5898|chr17:41949332-41951184|q21.31	Unknown	452	1776	-57	106
512	3.2	0	0	H2	178186	178247	-1302806	+	SD5900|chr17:40979537-40979708|q21.31	Unknown	111	172	0	107
949	0	0	0	H2	178289	178397	-1302656	+	SD4631|chr17:40979750-40979858|q21.31	Unknown	1	109	0	108
1369	55.1	0	0	H2	178731	179124	-1301929	+	SD4736|NA:0-0|NA	Unknown	1	394	0	109
533	6	0	13.7	H2	179124	179239	-1301814	+	SD4739|NA:0-0|NA	Unknown	15	116	0	110	*
1611	2	0	0	H2	179220	179417	-1301636	+	SD4709|chr17:40980679-40980876|q21.31	Unknown	1	198	0	111	*
3532	1.2	0	0.2	H2	179417	179821	-1301232	+	SD3957|chr17:40980876-40981280|q21.31	Unknown	1	404	0	112
2228	0	0	0	H2	179821	180068	-1300985	+	SD3958|NA:0-0|NA	Unknown	1	248	0	113	*
2593	3.9	0	0	H2	180068	180376	-1300677	+	SD2826|NA:0-0|NA	Unknown	1	309	0	114
746	11.9	0	2.5	H2	180302	180422	-1300631	+	SD3958|NA:0-0|NA	Unknown	128	245	-3	115	*
570	5.6	0	0	H2	180418	180489	-1300564	+	SD2821|NA:0-0|NA	Unknown	435	506	0	116	*
686	31.4	1.3	2.4	H2	180446	180745	-1300308	+	SD2828|chr17:63658228-63658535|q24.2	Unknown	3	299	-9	117	*
5774	13.8	1.5	0.6	H2	180489	181418	-1299635	+	SD2819|chr17:34438239-34440020|q12	Unknown	1	938	-471	118
1780	0.5	0	0	H2	181401	181595	-1299458	+	SD2825|chr17:40982860-40983054|q21.31	Unknown	1	195	0	119	*
4805	0.9	0.4	0.5	H2	181595	182151	-1298902	+	SD2829|NA:0-0|NA	Unknown	1	556	0	120
1528	16	0	0	H2	182151	182363	-1298690	+	SD2830|chr17:41945055-41945267|q21.31	Unknown	1	213	0	121	*
8174	26.7	0	0.1	H2	182363	183628	-1297425	+	SD2832|NA:0-0|NA	Unknown	1	1265	-101	122
4341	0.6	0	0	H2	184314	184789	-1296264	+	SD4733|NA:0-0|NA	Unknown	536	1011	-3	123
2046	7.7	0.7	0	H2	185357	185629	-1295424	C	SD8043|chr17:31271041-31272719|q12	Unknown	-232	1414	1140	124	*
4188	36.5	0	0.9	H2	185586	186397	-1294656	+	SD4731|chr17:27368175-27368990|q11.2	Unknown	1	805	0	125	*
5652	10	1.1	1.1	H2	185923	186738	-1294315	C	SD8043|chr17:31271041-31272719|q12	Unknown	-830	816	1	126	*
10577	18	0	0	H2	186397	187839	-1293214	+	SD4748|chr17:41939022-41941009|q21.31	Unknown	1	1443	-545	127
2040	0	0	0	H2	188400	188622	-1292431	+	SD4756|chr17:41938505-41939014|q21.31	Unknown	9	231	-279	128
1773	58.9	0	0	H2	188917	189490	-1291563	+	SD4755|chr17:41937916-41938497|q21.31	Unknown	9	582	0	129
8440	0	0	0	H2	189912	190828	-1290225	+	SD4753|NA:0-0|NA	Unknown	1	917	0	130
6898	36.1	0.1	0	H2	190828	192122	-1288931	+	SD4752|chr17:40992269-40993849|q21.31	Unknown	1	1297	-284	131	*
6826	0.5	0.4	0.1	H2	192482	193249	-1287804	+	SD4750|chr17:40993921-40995104|q21.31	Unknown	1	770	-406	132
10690	17.5	0.1	0.3	H2	193892	195390	-1285663	+	SD4747|chr17:63274100-63276169|q24.2	Unknown	3	1498	-175	133
1878	2.3	0	0	H2	196201	196421	-1284632	+	SD4745|NA:0-0|NA	Unknown	389	609	-63	134
1670	0.5	0	0	H2	196785	196977	-1284076	+	SD4744|NA:0-0|NA	Unknown	3	195	-4182	135
395	62	0	0	H2	197493	197684	-1283369	+	SD4744|NA:0-0|NA	Unknown	704	895	-3482	136
1433	1.2	0	0	H2	200013	200177	-1280876	+	SD4744|NA:0-0|NA	Unknown	2915	3079	-1298	137
385	0	0	0	H2	202390	202439	-1278614	+	SD4740|NA:0-0|NA	Unknown	122	171	-1233	138
3915	5.4	0	0.4	H2	203027	203509	-1277544	+	SD4740|NA:0-0|NA	Unknown	759	1239	-165	139
1189	1.3	0	6.6	H2	203804	203964	-1277089	+	SD4690|NA:0-0|NA	Unknown	111	261	-985	140
2300	54.4	0	0.1	H2	204264	204916	-1276137	+	SD4690|NA:0-0|NA	Unknown	250	901	-345	141
331	0	0	9.1	H2	205250	205297	-1275756	+	SD4690|NA:0-0|NA	Unknown	1202	1245	-1	142
6143	27.9	0	0.4	H2	206778	207790	-1273263	+	SD4692|NA:0-0|NA	Unknown	1481	2489	-136954	143
5013	38.4	0	0	H2	209021	210010	-1271043	+	SD4692|NA:0-0|NA	Unknown	3711	4700	-134743	144
59689	36.9	0	0.1	H2	210471	221781	-1259272	+	SD4692|NA:0-0|NA	Unknown	5161	16464	-122979	145
4501	40.4	0	0	H2	223002	223930	-1257123	+	SD4692|NA:0-0|NA	Unknown	17680	18608	-120835	146
20418	16.6	0	0.1	H2	224489	227288	-1253765	+	SD4692|NA:0-0|NA	Unknown	19167	21962	-117481	147
524	0	0	0	H2	229455	229512	-1251541	+	SD4692|NA:0-0|NA	Unknown	24129	24186	-115257	148
3129	5.8	0	1.1	H2	230497	230880	-1250173	+	SD4692|NA:0-0|NA	Unknown	25171	25550	-113893	149
2356	60.8	0	0	H2	232238	233087	-1247966	+	SD4692|NA:0-0|NA	Unknown	26908	27757	-111686	150
25797	33.6	0.2	0	H2	236428	241025	-1240028	+	SD4692|NA:0-0|NA	Unknown	31099	35704	-103739	151
19927	12.8	0	0	H2	241486	244029	-1237024	+	SD4692|NA:0-0|NA	Unknown	36165	38708	-100735	152
28138	33.4	0	0	H2	244493	249412	-1231641	+	SD4692|NA:0-0|NA	Unknown	39172	44089	-95354	153
523	0	0	0	H2	249970	250029	-1231024	+	SD4692|NA:0-0|NA	Unknown	44647	44706	-94737	154
55419	25	0	0.1	H2	250997	259563	-1221490	+	SD4692|NA:0-0|NA	Unknown	45533	54088	-85355	155
78537	16.7	0.1	0	H2	260232	270935	-1210118	+	SD4692|NA:0-0|NA	Unknown	54757	65463	-73980	156
14131	14.3	0.1	0	H2	271388	273267	-1207786	+	SD4692|NA:0-0|NA	Unknown	65916	67796	-71647	157
16724	26.6	0	0.4	H2	273925	276592	-1204461	+	SD4692|NA:0-0|NA	Unknown	68454	71110	-68333	158
29218	46.9	0	0	H2	277207	283961	-1197092	+	SD4692|NA:0-0|NA	Unknown	71725	78478	-60965	159
5039	0.2	0	0	H2	284583	285140	-1195913	+	SD4692|NA:0-0|NA	Unknown	79100	79657	-59786	160
22145	30.9	0	0.1	H2	285767	289725	-1191328	+	SD4692|NA:0-0|NA	Unknown	79956	83910	-55533	161
332	0	0	0	H2	290662	290700	-1190353	+	SD4692|NA:0-0|NA	Unknown	84843	84881	-54562	162
297	0	0	0	H2	291486	291519	-1189534	+	SD4692|NA:0-0|NA	Unknown	85666	85699	-53744	163
250	0	0	0	H2	292323	292353	-1188700	+	SD4692|NA:0-0|NA	Unknown	86503	86533	-52910	164
15721	32.4	0	0	H2	293150	295963	-1185090	+	SD4692|NA:0-0|NA	Unknown	87329	90142	-49301	165
13849	30.6	0	0	H2	296505	298966	-1182087	+	SD4692|NA:0-0|NA	Unknown	90684	93145	-46298	166
3694	14.3	0	0	H2	301855	302359	-1178694	+	SD4692|NA:0-0|NA	Unknown	96029	96533	-42910	167
3966	35.4	0	0	H2	302832	303614	-1177439	+	SD4692|NA:0-0|NA	Unknown	96976	97758	-41685	168
264	0	0	0	H2	304687	304716	-1176337	+	SD4692|NA:0-0|NA	Unknown	98831	98860	-40583	169
1361	35.7	0	0	H2	305160	305428	-1175625	+	SD4692|NA:0-0|NA	Unknown	99304	99572	-39871	170
252	0	0	0	H2	306263	306296	-1174757	+	SD4692|NA:0-0|NA	Unknown	100407	100440	-39003	171
14314	29.8	0	0.2	H2	308275	310784	-1170269	+	SD4692|NA:0-0|NA	Unknown	102407	104912	-34531	172
338	0	0	0	H2	312029	312068	-1168985	+	SD4692|NA:0-0|NA	Unknown	106157	106196	-33247	173
11694	7.9	0	0.1	H2	313054	314551	-1166502	+	SD4692|NA:0-0|NA	Unknown	107182	108678	-30765	174
2012	23.2	0	0	H2	317217	317531	-1163522	+	SD4692|NA:0-0|NA	Unknown	111345	111659	-27784	175
794	0	0	0	H2	318454	318544	-1162509	+	SD4692|NA:0-0|NA	Unknown	112583	112673	-26770	176
54180	32.7	0	0.3	H2	319056	328774	-1152279	+	SD4692|NA:0-0|NA	Unknown	113185	122882	-16561	177
3460	40.4	0	0	H2	329828	330574	-1150479	+	SD4692|NA:0-0|NA	Unknown	123932	124678	-14765	178
246	0	0	0	H2	331121	331150	-1149903	+	SD4692|NA:0-0|NA	Unknown	125225	125254	-14189	179
18932	26.9	0	0.1	H2	331461	334552	-1146501	+	SD4692|NA:0-0|NA	Unknown	125565	128654	-10789	180
11176	49.7	0	0.1	H2	335072	337983	-1143070	+	SD4692|NA:0-0|NA	Unknown	129174	132082	-7361	181
389	0	0	0	H2	338458	338511	-1142542	+	SD4692|NA:0-0|NA	Unknown	132557	132610	-6833	182
4281	14.6	5	0	H2	339104	339728	-1141325	+	SD4692|NA:0-0|NA	Unknown	133203	133858	-5585	183
11268	30.9	0	0.1	H2	340019	342017	-1139036	+	SD4692|NA:0-0|NA	Unknown	134158	136155	-3288	184
3337	17.6	0	0	H2	342734	343200	-1137853	+	SD4692|NA:0-0|NA	Unknown	136874	137340	-2103	185
510	0	0	0	H2	344286	344342	-1136711	+	SD4692|NA:0-0|NA	Unknown	138421	138477	-966	186
5288	43.5	0	0	H2	345571	346681	-1134372	+	SD5732|chr17:41997758-41999999|q21.31	Unknown	264	1374	-868	187
1383	0.6	0	0	H2	347276	347434	-1133619	+	SD5732|chr17:41997758-41999999|q21.31	Unknown	1969	2127	-115	188
1132	0.8	0	0	H2	347790	347912	-1133141	+	SD5725|chr17:40928985-40929748|q21.31	Unknown	242	364	-402	189
295	0	0	0	H2	348283	348314	-1132739	+	SD5725|chr17:40928985-40929748|q21.31	Unknown	735	766	0	190	*
1386	0	0	1.3	H2	348314	348474	-1132579	+	SD5724|chr17:40929748-40929958|q21.31	Unknown	1	159	-49	191
312	0	0	0	H2	348582	348620	-1132433	+	SD5726|chr17:40929959-40930179|q21.31	Unknown	59	97	-121	192
3586	60.1	0	0.4	H2	349094	350260	-1130793	+	SD5727|chr17:40930180-40932839|q21.31	Unknown	352	1513	-1156	193
1191	46.3	0	0	H2	351147	351416	-1129637	+	SD5727|chr17:40930180-40932839|q21.31	Unknown	2400	2669	0	194	*
7011	28.3	0	0.1	H2	351416	352506	-1128547	+	SD5728|chr17:40932839-40933919|q21.31	Unknown	1	1090	0	195
7725	13	0	0	H2	352583	353587	-1127466	C	SD4704|chr17:40933996-40935001|q21.31	Unknown	0	1005	1	196
664	0	0	0	H2	353587	353658	-1127395	C	SD4705|NA:0-0|NA	Unknown	0	172	101	197	*
1198	2.9	0	0	H2	353807	353942	-1127111	C	SD4706|NA:0-0|NA	Unknown	0	189	54	198
3690	1.2	0.2	0	H2	354580	354984	-1126069	C	SD4708|chr17:40935939-40937275|q21.31	Unknown	-53	1295	890	199
273	0	0	0	H2	355531	355567	-1125486	C	SD4708|chr17:40935939-40937275|q21.31	Unknown	-1005	343	307	200
4180	1.5	0.2	0.2	H2	356521	357000	-1124053	C	SD4710|NA:0-0|NA	Unknown	-648	480	1	201
2865	2.2	0	0	H2	357000	357320	-1123733	C	SD4714|chr17:42486665-42486991|q21.32	Unknown	0	321	1	202	*
6890	11.9	0	0.8	H2	357320	358182	-1122871	C	SD4715|chr17:42485778-42486665|q21.32	Unknown	0	888	33	203
3498	0	0.5	0	H2	358472	358848	-1122205	C	SD1748|NA:0-0|NA	Unknown	-94	379	1	204
1019	63.2	1	0	H2	358848	359233	-1121820	C	SD1746|chr17:41986081-41986466|q21.31	Unknown	0	390	1	205	*
1338	5.4	0	0	H2	359233	359398	-1121655	C	SD1745|chr17:40943443-40943730|q21.31	Unknown	0	288	123	206
385	9.6	0	0	H2	359538	359589	-1121464	C	SD1744|chr17:41984811-41985794|q21.31	Unknown	-19	903	852	207
1749	4.1	0	1.4	H2	359826	360048	-1121005	C	SD1744|chr17:41984811-41985794|q21.31	Unknown	-275	647	428	208
723	0	0	0	H2	360964	361041	-1120012	C	SD1742|NA:0-0|NA	Unknown	-206	78	1	209
226	27.2	6.7	4.7	H2	361027	361130	-1119923	C	SD7430|NA:0-0|NA	Unknown	-103	409	304	210	*
10699	1.9	1.1	0.8	H2	361079	362309	-1118744	C	SD1669|NA:0-0|NA	Unknown	0	1421	188	211
1750	1.1	0	0	H2	362607	362797	-1118256	C	SD1740|chr17:40946714-40947017|q21.31	Unknown	-111	191	1	212	*
10988	3.1	0	0	H2	362797	364068	-1116985	C	SD1738|NA:0-0|NA	Unknown	0	1272	1	213
2133	4	0	0	H2	364068	364314	-1116739	C	SD1737|NA:0-0|NA	Unknown	0	249	3	214	*
3653	1	0	0.2	H2	364328	364728	-1116325	C	SD1734|chr17:40952521-40952932|q21.31	Unknown	0	402	3	215
2955	3	0	0.3	H2	364734	365072	-1115981	C	SD1733|chr17:40952932-40953270|q21.31	Unknown	0	338	1	216	*
4105	15.5	0.7	0.5	H2	365072	365634	-1115419	C	SD1732|chr17:40953270-40953832|q21.31	Unknown	0	566	3	217
10299	3.1	0.4	0.8	H2	365636	366838	-1114215	C	SD1787|chr17:40953832-40957413|q21.31	Unknown	0	3564	2366	218
4461	48.1	0	0.7	H2	367790	368879	-1112174	C	SD1787|chr17:40953832-40957413|q21.31	Unknown	-2143	1421	339	219
996	0	0	0	H2	369258	369367	-1111686	+	SD1785|chr17:41975947-41976096|q21.31	Unknown	41	150	0	220
4279	4.6	1	0.2	H2	369370	369887	-1111166	+	SD7757|chr17:41974749-41975947|q21.31	Unknown	2	523	-683	221
2042	10	7.4	3.1	H2	371695	372098	-1108955	C	SD4603|chr17:41972641-41973690|q21.31	Unknown	-66	1003	583	222	*
6035	4.8	0.9	1.1	H2	371893	372675	-1108378	C	SD4603|chr17:41972641-41973690|q21.31	Unknown	-286	783	3	223
1280	2.7	0	0	H2	372677	372824	-1108229	C	SD4602|NA:0-0|NA	Unknown	0	1213	1066	224
1405	1.9	0	0	H2	373162	373322	-1107731	C	SD4602|NA:0-0|NA	Unknown	-450	763	603	225
2003	36.7	0.9	0.7	H2	373651	374081	-1106972	C	SD4602|NA:0-0|NA	Unknown	-781	432	1	226
1418	45.2	0	0	H2	374487	374800	-1106253	C	SD4607|NA:0-0|NA	Unknown	-404	3082	2769	227
325	0	0	0	H2	375110	375144	-1105909	C	SD4607|NA:0-0|NA	Unknown	-1023	2463	2429	228
1657	0	0	0	H2	380798	380978	-1100075	C	SD4606|chr17:41958254-41964774|q21.31	Unknown	-173	6292	6112	229
32922	26.4	0.1	0	H2	382034	387017	-1094036	C	SD4606|chr17:41958254-41964774|q21.31	Unknown	-1408	5057	68	230
4889	0.6	0	0.2	H2	387352	387885	-1093168	C	SD1760|NA:0-0|NA	Unknown	-184	544	12	231
1040	0.8	4.9	0.8	H2	388235	388357	-1092696	+	SD1761|NA:0-0|NA	Unknown	304	431	-169	232
6679	23	0.3	0.3	H2	388526	389566	-1091487	+	SD1762|chr17:41955779-41956818|q21.31	Unknown	1	1041	0	233
2619	4.1	1.1	3.2	H2	389568	389917	-1091136	+	SD1764|chr17:41955428-41955777|q21.31	Unknown	1	343	0	234
2996	3.3	0.3	0.3	H2	390230	390592	-1090461	+	SD4647|chr17:34451435-34451896|q12	Unknown	1	363	0	235
3181	1.1	0	0	H2	390731	391086	-1089967	+	SD4646|chr17:34450804-34451435|q12	Unknown	140	495	-134	236
2117	0.4	0	0	H2	391237	391467	-1089586	+	SD4644|chr17:34450552-34450787|q12	Unknown	1	231	0	237	*
3452	8.2	0.2	0	H2	391467	391892	-1089161	+	SD4643|chr17:31317463-31318213|q12	Unknown	1	427	0	238
1611	30.6	0	0.4	H2	392079	392350	-1088703	+	SD4642|chr17:40975429-40975884|q21.31	Unknown	184	454	0	239	*
1809	1.9	0	0	H2	392350	392554	-1088499	+	SD4641|chr17:40975884-40976088|q21.31	Unknown	1	205	0	240	*
3288	1.9	0	0	H2	392554	392928	-1088125	+	SD4639|NA:0-0|NA	Unknown	1	375	-447	241
1289	0	0	0	H2	393739	393883	-1087170	+	SD5897|NA:0-0|NA	Unknown	198	342	-277	242
7713	30.2	0	1.7	H2	394608	395954	-1085099	+	SD5898|chr17:41949332-41951184|q21.31	Unknown	452	1776	-57	243
880	2	0	0	H2	396082	396182	-1084871	+	SD5900|chr17:40979537-40979708|q21.31	Unknown	72	172	0	244
970	0	0	0	H2	396224	396332	-1084721	+	SD4631|chr17:40979750-40979858|q21.31	Unknown	1	109	0	245
1397	55.1	0	0	H2	396666	397059	-1083994	+	SD4736|NA:0-0|NA	Unknown	1	394	0	246
550	6	0	13.7	H2	397059	397174	-1083879	+	SD4739|NA:0-0|NA	Unknown	15	116	0	247	*
1644	2	0	0	H2	397155	397352	-1083701	+	SD4709|chr17:40980679-40980876|q21.31	Unknown	1	198	0	248	*
3609	1.2	0	0.2	H2	397352	397756	-1083297	+	SD3957|chr17:40980876-40981280|q21.31	Unknown	1	404	0	249
2277	0	0	0	H2	397756	398003	-1083050	+	SD3958|NA:0-0|NA	Unknown	1	248	0	250	*
2645	3.9	0	0	H2	398003	398311	-1082742	+	SD2826|NA:0-0|NA	Unknown	1	309	0	251
762	11.9	0	2.5	H2	398237	398357	-1082696	+	SD3958|NA:0-0|NA	Unknown	128	245	-3	252	*
581	5.6	0	0	H2	398353	398424	-1082629	+	SD2821|NA:0-0|NA	Unknown	435	506	0	253	*
702	31.4	1.3	2.4	H2	398381	398680	-1082373	+	SD2828|chr17:63658228-63658535|q24.2	Unknown	3	299	-9	254	*
5887	13.8	1.5	0.6	H2	398424	399353	-1081700	+	SD2819|chr17:34438239-34440020|q12	Unknown	1	938	-471	255
1701	0.5	0	0	H2	399336	399530	-1081523	+	SD2825|chr17:40982860-40983054|q21.31	Unknown	1	195	0	256	*
4580	0.9	0.4	0.5	H2	399530	400086	-1080967	+	SD2829|NA:0-0|NA	Unknown	1	556	0	257
1449	16.4	0	0	H2	400086	400298	-1080755	+	SD2830|chr17:41945055-41945267|q21.31	Unknown	1	213	0	258	*
7811	26.7	0	0.1	H2	400298	401563	-1079490	+	SD2832|NA:0-0|NA	Unknown	1	1265	-101	259
4154	0.6	0	0	H2	402249	402724	-1078329	+	SD4733|NA:0-0|NA	Unknown	536	1011	-3	260
1952	7.7	0.7	0	H2	403292	403564	-1077489	C	SD8043|chr17:31271041-31272719|q12	Unknown	-232	1414	1140	261	*
3998	36.5	0	0.9	H2	403521	404332	-1076721	+	SD4731|chr17:27368175-27368990|q11.2	Unknown	1	805	0	262	*
5359	10	1.1	1.1	H2	403858	404673	-1076380	C	SD8043|chr17:31271041-31272719|q12	Unknown	-830	816	1	263	*
10122	18	0	0	H2	404332	405774	-1075279	+	SD4748|chr17:41939022-41941009|q21.31	Unknown	1	1443	-545	264
1952	0	0	0	H2	406335	406557	-1074496	+	SD4756|chr17:41938505-41939014|q21.31	Unknown	9	231	-279	265
1688	58.9	0	0	H2	406852	407425	-1073628	+	SD4755|chr17:41937916-41938497|q21.31	Unknown	9	582	0	266
8080	0	0	0	H2	407847	408763	-1072290	+	SD4753|NA:0-0|NA	Unknown	1	917	0	267
6594	36.1	0.1	0	H2	408763	410057	-1070996	+	SD4752|chr17:40992269-40993849|q21.31	Unknown	1	1297	-284	268	*
6540	0.5	0.4	0.1	H2	410417	411184	-1069869	+	SD4750|chr17:40993921-40995104|q21.31	Unknown	1	770	-406	269
9942	19.7	0.1	0.3	H2	411827	413325	-1067728	+	SD4747|chr17:63274100-63276169|q24.2	Unknown	3	1498	-175	270
1801	2.3	0	0	H2	414136	414356	-1066697	+	SD4745|NA:0-0|NA	Unknown	389	609	-63	271
1602	0.5	0	0	H2	414720	414912	-1066141	+	SD4744|NA:0-0|NA	Unknown	3	195	-4182	272
1375	1.2	0	0	H2	417948	418112	-1062941	+	SD4744|NA:0-0|NA	Unknown	2915	3079	-1298	273
372	0	0	0	H2	420334	420383	-1060670	+	SD4740|NA:0-0|NA	Unknown	122	171	-1233	274
3745	5.6	0	0.4	H2	420971	421453	-1059600	+	SD4740|NA:0-0|NA	Unknown	759	1239	-165	275
1139	1.3	0	6.6	H2	421748	421908	-1059145	+	SD4690|NA:0-0|NA	Unknown	111	261	-985	276
2513	49.2	0	0.1	H2	422208	422860	-1058193	+	SD4690|NA:0-0|NA	Unknown	250	901	-345	277
302	2.2	0	8.9	H2	423194	423242	-1057811	+	SD4690|NA:0-0|NA	Unknown	1202	1246	0	278	*
10798	18.8	0	1.3	H2	423242	424910	-1056143	+	SD4691|NA:0-0|NA	Unknown	1	1648	-6952	279
1493	5.6	0	0.5	H2	425416	425614	-1055439	+	SD4691|NA:0-0|NA	Unknown	2146	2343	-6257	280
1742	3.5	0	0	H2	426079	426310	-1054743	+	SD4691|NA:0-0|NA	Unknown	2805	3036	-5564	281
20456	20.7	0.5	0.5	H2	427913	431140	-1049913	+	SD4691|NA:0-0|NA	Unknown	4426	7653	-947	282
2630	56.1	0	1.7	H2	431421	432355	-1048698	+	SD4691|NA:0-0|NA	Unknown	7670	8588	-12	283
12212	4.7	1.7	1.3	H2	432651	434263	-1046790	+	SD1747|chr17:63252902-63254796|q24.2	Unknown	285	1904	0	284
381	3.9	0	0	H2	434263	434313	-1046740	+	SD4590|chr17:63252574-63252902|q24.2	Unknown	1	51	-207	285	*
342	11.9	0	0	H2	434308	434366	-1046687	+	SD4590|chr17:63252574-63252902|q24.2	Unknown	162	220	-38	286	*
5797	5.9	1.6	0	H2	434425	435294	-1045759	+	SD4592|NA:0-0|NA	Unknown	36	919	0	287
281	11.4	0	0	H2	435299	435342	-1045711	+	SD4593|chr17:63250025-63251571|q24.2	Unknown	1	44	-1183	288
272	5.6	0	0	H2	435882	435917	-1045136	+	SD4595|NA:0-0|NA	Unknown	85	120	-1514	289
654	3.7	0	0	H2	436418	436498	-1044555	+	SD4595|NA:0-0|NA	Unknown	608	688	-946	290
2172	49.7	2	2.4	H2	436874	437617	-1043436	+	SD4595|NA:0-0|NA	Unknown	735	1475	-159	291
5715	30.9	0.4	1.4	H2	437917	438988	-1042065	+	SD6021|chr17:63380454-63381577|q24.2	Unknown	2	1062	0	292
1749	51.7	2.3	1.2	H2	438995	439552	-1041501	+	SD6024|NA:0-0|NA	Unknown	1	564	-140	293
513	4.2	0	0	H2	440124	440194	-1040859	+	SD6025|NA:0-0|NA	Unknown	414	484	0	294
683	0	0	17.3	H2	440206	440327	-1040726	+	SD2170|NA:0-0|NA	Unknown	1	104	-1039	295	*
1732	59.5	0.1	2.1	H2	440253	440966	-1040087	+	SD2170|NA:0-0|NA	Unknown	30	729	-414	296
8936	2.1	0	1.3	H2	441813	442913	-1038140	+	SD2169|chr17:63388291-63389820|q24.2	Unknown	422	1508	0	297	*
10310	1.4	0.5	0.4	H2	442913	444159	-1036894	+	SD2166|chr17:63389820-63391280|q24.2	Unknown	1	1248	-207	298
571	1.4	0	0	H2	444157	444225	-1036828	+	SD2166|chr17:63389820-63391280|q24.2	Unknown	1224	1292	-163	299	*
440	1.8	0	0	H2	444744	444799	-1036254	+	SD5714|NA:0-0|NA	Unknown	1	56	-123	300
1001	0	0	0.8	H2	445267	445386	-1035667	+	SD5715|NA:0-0|NA	Unknown	344	462	0	301
3010	1.6	0.5	0.8	H2	446361	446737	-1034316	+	SD5717|chr17:63392939-63393399|q24.2	Unknown	1	376	-85	302
997	0.9	0	0	H2	447132	447246	-1033807	+	SD5719|NA:0-0|NA	Unknown	69	183	-775	303
970	18.9	0	0	H2	447874	448021	-1033032	+	SD5719|NA:0-0|NA	Unknown	798	945	-13	304
809	71.4	0	1.2	H2	448587	449089	-1031964	+	SD5720|chr17:41713832-41715074|q21.31	Unknown	513	1009	-185	305
344	59.3	0.4	0	H2	449890	450162	-1030891	+	SD5722|chr17:63403996-63412672|q24.2	Unknown	1167	1440	-7072	306	*
366	20.7	0	6.5	H2	450070	450167	-1030886	+	SD5722|chr17:63403996-63412672|q24.2	Unknown	747	838	-7674	307
241	22.4	0	0	H2	450799	450865	-1030188	+	SD5722|chr17:63403996-63412672|q24.2	Unknown	1756	1822	-6690	308
813	6.7	0	1.7	H2	451590	451710	-1029343	+	SD5722|chr17:63403996-63412672|q24.2	Unknown	2155	2273	-6239	309
4225	2.9	0	0.2	H2	452343	452860	-1028193	+	SD5722|chr17:63403996-63412672|q24.2	Unknown	2857	3373	-5139	310
4034	2.9	0	1	H2	453176	453693	-1027360	+	SD5722|chr17:63403996-63412672|q24.2	Unknown	3665	4177	-4335	311
716	6.8	6.8	0	H2	453659	453775	-1027278	+	SD5722|chr17:63403996-63412672|q24.2	Unknown	4112	4236	-4276	312	*
5249	6.9	0.7	0.3	H2	454073	454774	-1026279	+	SD5722|chr17:63403996-63412672|q24.2	Unknown	4231	4935	-3577	313
15736	5	0	0.6	H2	455084	457088	-1023965	+	SD5722|chr17:63403996-63412672|q24.2	Unknown	4922	6915	-1597	314	*
17884	5	0	0.8	H2	455089	457247	-1023806	+	SD5722|chr17:63403996-63412672|q24.2	Unknown	4927	7069	-1443	315
13655	29.2	0	1.4	H2	456095	458481	-1022572	+	SD5722|chr17:63403996-63412672|q24.2	Unknown	5928	8281	-231	316	*
1982	5.8	0	0.4	H2	458813	459054	-1021999	+	SD5722|chr17:63403996-63412672|q24.2	Unknown	8272	8512	0	317
6687	13	0.9	1.7	H2	459351	460374	-1020679	+	SD5772|chr17:63416280-63420395|q24.2	Unknown	267	1282	-2729	318
3643	41.5	0.8	2.5	H2	459824	460884	-1020169	+	SD5772|chr17:63416280-63420395|q24.2	Unknown	741	1783	-2228	319	*
6598	6.5	0	0.3	H2	460869	461649	-1019404	+	SD5772|chr17:63416280-63420395|q24.2	Unknown	1744	2522	-1489	320
8061	12.2	0	1.5	H2	462078	463217	-1017836	+	SD5772|chr17:63416280-63420395|q24.2	Unknown	2889	4011	0	321
6190	25.8	0	0.9	H2	463241	464207	-1016846	+	SD5774|chr17:63422655-63426692|q24.2	Unknown	1	958	-1872	322
6248	37.2	0.1	1.5	H2	464728	465940	-1015113	+	SD5774|chr17:63422655-63426692|q24.2	Unknown	1525	2720	-110	323
749	1	0	11.4	H2	469338	469454	-1011599	+	SD4596|chr5:140033042-140033159|q31.3	Unknown	1	105	0	324
3683	0.7	0	2.8	H2	469457	469928	-1011125	+	SD4597|chr5:140032215-140032675|q31.3	Unknown	1	459	0	325
8558	0.4	0.4	0	H2	469930	470877	-1010176	+	SD4598|chr5:140030562-140031519|q31.3	Unknown	1	952	-6	326
562	0	0	0	H2	471732	471793	-1009260	+	SD1807|NA:0-0|NA	Unknown	555	616	-4308	327
253	42.1	0	0	H2	472393	472449	-1008604	+	SD1807|NA:0-0|NA	Unknown	1212	1268	-3656	328
1370	54.1	0	1.3	H2	472921	473313	-1007740	+	SD1807|NA:0-0|NA	Unknown	1740	2127	-2797	329
855	1.1	0	0	H2	474565	474656	-1006397	+	SD1807|NA:0-0|NA	Unknown	3370	3461	-1463	330
273	0	0	0	H2	475460	475488	-1005565	+	SD1807|NA:0-0|NA	Unknown	4262	4290	-634	331
1425	38.8	0	0	H2	475885	476157	-1004896	+	SD1807|NA:0-0|NA	Unknown	4652	4924	0	332
5258	1.1	0	0	H2	478666	479236	-1001817	+	SD1794|chr17:41682478-41685507|q21.31	Unknown	151	721	-2303	333
542	0	0	0	H2	479705	479764	-1001289	+	SD1794|chr17:41682478-41685507|q21.31	Unknown	1184	1243	-1781	334
2443	57	0.1	0	H2	480550	481290	-999763	+	SD1794|chr17:41682478-41685507|q21.31	Unknown	2035	2776	-248	335
7933	3.9	1.1	2.7	H2	482644	483668	-997385	C	SD4603|chr17:41972641-41973690|q21.31	Unknown	-59	1010	2	336
3566	55.9	0	3.4	H2	483670	484904	-996149	C	SD4602|NA:0-0|NA	Unknown	-4	1209	15	337
18390	1.9	0	1.1	H2	485091	487203	-993850	C	SD4604|NA:0-0|NA	Unknown	-166	3048	958	338
4368	44	1.1	0.9	H2	486799	487799	-993254	C	SD4604|NA:0-0|NA	Unknown	-1850	1364	362	339	*
697	1.2	0	0	H2	488162	488242	-992811	C	SD4611|NA:0-0|NA	Unknown	-2	1131	1051	340
2094	53.9	0	0	H2	488759	489342	-991711	C	SD4611|NA:0-0|NA	Unknown	-540	593	10	341
801	33.6	0	0	H2	490142	490290	-990763	C	SD4615|chr17:41650183-41674686|q21.31	Unknown	-774	22515	22367	342
386	20	0	0	H2	493007	493081	-987972	C	SD4615|chr17:41650183-41674686|q21.31	Unknown	-3625	19664	19590	343
344	0	0	0	H2	494906	494945	-986108	C	SD4615|chr17:41650183-41674686|q21.31	Unknown	-5994	17295	17256	344
941	54.6	0	0	H2	496639	496931	-984122	C	SD4615|chr17:41650183-41674686|q21.31	Unknown	-7677	15612	15320	345
910	1	0	0	H2	497667	497764	-983289	C	SD4615|chr17:41650183-41674686|q21.31	Unknown	-8698	14591	14494	346
480	0	0	0	H2	498528	498584	-982469	C	SD4615|chr17:41650183-41674686|q21.31	Unknown	-9557	13732	13676	347
1315	0	0	0	H2	499369	499513	-981540	C	SD4615|chr17:41650183-41674686|q21.31	Unknown	-10394	12895	12751	348
9051	36.6	0	1.1	H2	499974	501661	-979392	C	SD4615|chr17:41650183-41674686|q21.31	Unknown	-10995	12294	10626	349
6794	50.5	0	0.5	H2	500531	502233	-978820	C	SD4615|chr17:41650183-41674686|q21.31	Unknown	-11536	11753	10059	350	*
243	3.5	0	0	H2	502556	502584	-978469	C	SD4615|chr17:41650183-41674686|q21.31	Unknown	-13550	9739	9711	351
48791	19.9	0.1	0.2	H2	502987	509718	-971335	C	SD4615|chr17:41650183-41674686|q21.31	Unknown	-13975	9314	2589	352
713	0	0	0	H2	510880	510960	-970093	C	SD4615|chr17:41650183-41674686|q21.31	Unknown	-20985	2304	2224	353
877	71.8	0	0	H2	511734	512198	-968855	C	SD4615|chr17:41650183-41674686|q21.31	Unknown	-21828	1461	997	354
1224	5.1	0	0	H2	513462	513618	-967435	+	SD12088|NA:0-0|NA	Unknown	2063	2219	-71514	355
6164	59.1	0	0	H2	520218	522191	-958862	+	SD12088|NA:0-0|NA	Unknown	246	2219	-71514	356
711	0	0	0	H2	525748	525831	-955222	+	SD12088|NA:0-0|NA	Unknown	5774	5857	-67876	357
9485	21.6	0	0.1	H2	526412	527827	-953226	+	SD12088|NA:0-0|NA	Unknown	6438	7852	-65881	358
281	0	0	0	H2	529059	529091	-951962	+	SD12088|NA:0-0|NA	Unknown	9073	9105	-64628	359
46272	31.2	0.1	0.5	H2	529395	537329	-943724	+	SD12088|NA:0-0|NA	Unknown	9408	17315	-56418	360	*
61578	24.9	0	0.3	H2	536991	546389	-934664	+	SD12088|NA:0-0|NA	Unknown	16977	26349	-47384	361
13460	34.3	0	0	H2	547016	549416	-931637	+	SD12088|NA:0-0|NA	Unknown	26976	29375	-44358	362
27416	37.5	0	0.4	H2	550099	555382	-925671	+	SD12088|NA:0-0|NA	Unknown	30058	35319	-38414	363
53617	13.7	0	0.1	H2	556828	563808	-917245	+	SD12088|NA:0-0|NA	Unknown	36758	43731	-30002	364
1021	0	0	0	H2	564422	564539	-916514	+	SD12088|NA:0-0|NA	Unknown	44345	44462	-29271	365
13579	20.4	0	0	H2	565132	567077	-913976	+	SD12088|NA:0-0|NA	Unknown	45055	47000	-26733	366
20621	27.1	0	0	H2	567588	570860	-910193	+	SD12088|NA:0-0|NA	Unknown	47511	50783	-22950	367
15210	32.6	0	0	H2	568861	571499	-909554	+	SD12088|NA:0-0|NA	Unknown	48784	51422	-22311	368	*
43349	25.4	0	0	H2	571976	578653	-902400	+	SD12088|NA:0-0|NA	Unknown	51899	58573	-15160	369
37992	34.5	0	0.2	H2	579172	586049	-895004	+	SD12088|NA:0-0|NA	Unknown	59092	65957	-7776	370
12640	32.5	0	0.3	H2	586784	589037	-892016	+	SD12088|NA:0-0|NA	Unknown	66670	68917	-4816	371
23703	31.9	0	0	H2	589744	593854	-887199	+	SD12088|NA:0-0|NA	Unknown	69624	73733	0	372
245	14	0	4	H2	603365	603416	-877637	C	SD2721|NA:0-0|NA	Unknown	-61467	30964	30915	373
1461	4	0	1.7	H2	623943	624122	-856931	+	SD4617|chr17:41534429-41539337|q21.31	Unknown	56	232	-4283	374
11630	46.1	0	0.3	H2	624718	627502	-853551	+	SD4617|chr17:41534429-41539337|q21.31	Unknown	766	3542	-973	375
9461	50.2	0.1	0.4	H2	625747	628260	-852793	+	SD4617|chr17:41534429-41539337|q21.31	Unknown	1792	4299	-216	376	*
1022	41.5	0	0	H2	628576	628792	-852261	+	SD4617|chr17:41534429-41539337|q21.31	Unknown	4299	4515	0	377
362	9.3	0	7.4	H2	629859	629916	-851137	C	SD4617|chr17:41534429-41539337|q21.31	Unknown	0	4515	4462	378
18643	3.1	0	0.6	H2	630226	632464	-848589	C	SD4616|chr17:41520700-41533001|q21.31	Unknown	0	11626	9402	379
10668	28.9	0.1	1	H2	633899	635793	-845260	C	SD4616|chr17:41520700-41533001|q21.31	Unknown	-3599	8027	6150	380
10786	18.6	0.5	1.1	H2	635878	637514	-843539	C	SD4616|chr17:41520700-41533001|q21.31	Unknown	-5511	6115	4489	381
380	4.3	0	0	H2	639082	639127	-841926	C	SD4616|chr17:41520700-41533001|q21.31	Unknown	-8613	3013	2968	382
14379	24.3	0	0.9	H2	639819	642100	-838953	C	SD4616|chr17:41520700-41533001|q21.31	Unknown	-9201	2425	164	383
244	19.6	3.5	1.7	H2	668853	668909	-812144	+	SD10221|chr5:49725456-49759303|q11.1	Unknown	14424	14481	-19085	384
261	15.8	0	7.1	H2	671992	672066	-808987	+	SD12028|chr7:48663223-48683765|p12.3	Unknown	7197	7266	-12963	385	*
278	14.1	0	3.5	H2	672013	672071	-808982	C	SD4723|chr17:40899996-40915562|q21.31	Unknown	-8945	6589	6533	386
229	26.2	0	1.5	H2	695736	695801	-785252	+	SD8307|chr9:41424677-41446505|p12	Unknown	21154	21218	-605	387	*
250	13.2	0	0	H2	695764	695801	-785252	+	SD4561|NA:0-0|NA	Unknown	14370	14407	-1071	388
232	20.8	0	2.1	H2	698589	698637	-782416	+	SD9495|chr16:86504383-86514320|q24.2	Unknown	4260	4307	-5510	389
334	20.5	3.3	3.3	H2	708473	708563	-772490	+	SD9559|chr16:22464053-22532629|p12.1	Unknown	30063	30153	-38037	390
246	26.1	1.5	0	H2	708518	708582	-772471	+	SD1777|chr17:22984442-22990924|q11.2	Unknown	1476	1541	-4781	391	*
232	22	3.8	10	H2	732096	732201	-748852	C	SD6533|chr15:75938308-75947690|q24.3	Unknown	-11274	1528	1429	392
253	22.1	0	5.1	H2	736243	736304	-744749	+	SD3376|chr9:94173844-94202336|q22.32	Unknown	4926	4984	-23472	393
288	22.5	8.2	2.6	H2	737502	737574	-743479	C	SD5476|chr9:38789843-38800000|p13.1	Unknown	-7633	2507	2431	394
277	21.3	13.2	2	H2	737504	737594	-743459	C	SD5521|chrX:91554144-91631060|q21.31	Unknown	-21670	55026	54926	395	*
307	14.8	1.9	0	H2	737506	737559	-743494	+	SD10153|chr1:120557941-120573845|p11.2	Unknown	8102	8156	-7740	396
228	14.6	2.4	0	H2	743470	743510	-737543	C	SD11911|NA:0-0|NA	Unknown	-12759	21658	21617	397
237	25.4	1.4	2.8	H2	747079	747151	-733902	+	SD4001|chr7:151390953-151427203|q36.1	Unknown	29950	30021	-5792	398
227	22.9	0	5.3	H2	750695	750754	-730299	+	SD82|chr20:62033907-62037820|q13.33	Unknown	1401	1457	-2296	399
226	6.8	2.2	2.2	H2	764870	764914	-716139	C	SD3888|chr12:62405516-62432514|q14.2	Unknown	-1177	25606	25562	400
315	23	1.4	0	H2	804745	804818	-676235	+	SD807|chr2:156944975-156947184|q24.1	Unknown	2034	2108	-102	401
231	3.3	0	0	H2	809122	809151	-671902	C	SD5150|chr7:76400000-76453621|q11.23	Unknown	-8174	44956	44927	402
231	23.4	7.1	4	H2	814086	814183	-666870	C	SD3248|chr10:51630663-51671002|q11.23	Unknown	-16160	24165	24065	403
248	24.8	3.5	6.2	H2	816984	817099	-663954	+	SD5190|chr7:73878329-73925343|q11.23	Unknown	14635	14747	-32253	404
238	15	0	0	H2	826586	826625	-654428	+	SD4784|chr15:26053471-26067317|q13.1	Unknown	10955	10994	-2717	405
486	27.1	2.8	2.1	H2	844932	845074	-635979	C	SD2525|chr5:68921756-68944185|q13.2	Unknown	-17645	4770	4627	406
237	18	0	0	H2	845148	845197	-635856	C	SD2525|chr5:68921756-68944185|q13.2	Unknown	-17883	4532	4483	407
241	32	4	5.7	H2	958609	958734	-522319	+	SD73|chr20:48499425-48517336|q13.13	Unknown	12478	12601	-4561	408
225	25.8	1.6	0	H2	958706	958767	-522286	C	SD3476|chr3:124910977-124918515|q21.1	Unknown	-6662	780	718	409	*
236	24.9	0	7.2	H2	961384	961487	-519566	+	SD1233|NA:0-0|NA	Unknown	20610	20706	-67908	410
351	24.9	1.9	6.8	H2	964558	964712	-516341	+	SD3476|chr3:124910977-124918515|q21.1	Unknown	725	872	-6570	411
242	12.3	21.1	0	H2	971492	971548	-509505	+	SD9523|chr16:18515115-18640357|p12.3	Unknown	3356	3424	-121624	412
226	25	9	7	H2	974685	974839	-506214	C	SD4963|chr4:166490060-166495374|q32.3	Unknown	-2008	3300	3143	413
273	21.2	12.2	1.6	H2	976348	976462	-504591	C	SD7813|chr6:26775200-26779306|p22.1	Unknown	-3959	181	55	414	*
276	31.1	6	0.7	H2	976375	976507	-504546	+	SD1418|chr17_random:1713818-1752566|NU	LL Unknown	23237	23376	-15106	415
264	25	0	0	H2	1000351	1000406	-480647	+	SD7571|chr9:68192088-68203423|q13	Unknown	10702	10757	-559	416
226	11.9	7.1	0	H2	1011680	1011721	-469332	C	SD10375|chrX:3024274-3063817|p22.33	Unknown	-2434	34097	34053	417
225	25	5.2	1.2	H2	1014915	1014991	-466062	C	SD5037|chr10:28465767-28473860|p12.1	Unknown	-8394	1068	989	418	*
249	16.7	0	0	H2	1014934	1014987	-466066	+	SD2347|chr6:57794310-57902237|p11.2	Unknown	101922	101975	-2336	419
228	22.4	1.4	2.9	H2	1019787	1019855	-461198	C	SD10573|NA:0-0|NA	Unknown	-888	12987	12920	420
240	21.3	1.6	4.8	H2	1060717	1060780	-420273	C	SD104|chr22:20633423-20637420|q11.22	Unknown	-2541	1457	1396	421
240	32.4	1.9	8.6	H2	1062890	1063051	-418002	C	SD1162|chr14:23528294-23575846|q11.2	Unknown	-30415	4288	4137	422
239	29.7	6.8	0	H2	1063150	1063223	-417830	C	SD707|NA:0-0|NA	Unknown	-4851	10908	10830	423
322	23.2	0	1.2	H2	1066918	1067000	-414053	C	SD6214|chr22:29786167-29799533|q12.2	Unknown	-5177	8076	7995	424
275	17.6	5.9	0	H2	1073261	1073311	-407742	+	SD8888|chr20:48424178-48468432|q13.13	Unknown	4364	4417	-36111	425	*
304	15.6	0	0	H2	1073275	1073319	-407734	C	SD11556|chr5:288807-295344|p15.33	Unknown	-5389	1027	983	426
227	19.6	10.7	0	H2	1084084	1084139	-396914	C	SD2955|chr17:33604214-33641644|q12	Unknown	-10284	27105	27044	427
228	8.6	0	0	H2	1086149	1086183	-394870	+	SD4799|chr15:26138519-26144698|q13.1	Unknown	4200	4234	-1770	428
863	72	0	0	H2	1104473	1104937	-376116	+	SD4615|chr17:41650183-41674686|q21.31	Unknown	997	1461	-21828	429
255	0	0	0	H2	1105230	1105257	-375796	+	SD4615|chr17:41650183-41674686|q21.31	Unknown	1753	1780	-21509	430
713	0	0	0	H2	1105717	1105797	-375256	+	SD4615|chr17:41650183-41674686|q21.31	Unknown	2224	2304	-20985	431
48723	19.9	0	0.4	H2	1106961	1113709	-367344	+	SD4615|chr17:41650183-41674686|q21.31	Unknown	2589	9314	-13975	432
243	3.5	0	0	H2	1114113	1114141	-366912	+	SD4615|chr17:41650183-41674686|q21.31	Unknown	9711	9739	-13550	433
9787	47.2	0	0.4	H2	1114464	1116707	-364346	+	SD4615|chr17:41650183-41674686|q21.31	Unknown	10059	12294	-10995	434
1372	17.2	0	0	H2	1117169	1117354	-363699	+	SD4615|chr17:41650183-41674686|q21.31	Unknown	12751	12936	-10353	435
1162	22	0	0	H2	1117992	1118159	-362894	+	SD4615|chr17:41650183-41674686|q21.31	Unknown	13565	13732	-9557	436
1120	76.2	0	1.4	H2	1118922	1119828	-361225	+	SD4615|chr17:41650183-41674686|q21.31	Unknown	14494	15387	-7902	437
344	0	0	0	H2	1121695	1121734	-359319	+	SD4615|chr17:41650183-41674686|q21.31	Unknown	17256	17295	-5994	438
445	5.6	1.4	0	H2	1123170	1123240	-357813	+	SD6857|chr2:112331466-112341052|q13	Unknown	427	498	-9049	439	*
1883	55.4	0.1	0.1	H2	1123181	1124110	-356943	+	SD4615|chr17:41650183-41674686|q21.31	Unknown	18735	19664	-3625	440	*
2628	14	3.1	2.5	H2	1123181	1123626	-357427	+	SD1035|chr2:128320083-128321591|q14.3	Unknown	375	823	-676	441
609	41.5	0	0	H2	1126837	1126959	-354094	+	SD4615|chr17:41650183-41674686|q21.31	Unknown	22367	22489	-800	442
2116	53.7	0	0	H2	1127790	1128376	-352677	+	SD4611|NA:0-0|NA	Unknown	7	593	-540	443
714	0	0	0	H2	1128888	1128968	-352085	+	SD4611|NA:0-0|NA	Unknown	1051	1131	-2	444
4649	41.7	0.2	1.5	H2	1129331	1130346	-350707	+	SD4604|NA:0-0|NA	Unknown	362	1364	-1850	445	*
18390	1.9	0	1.1	H2	1129942	1132054	-348999	+	SD4604|NA:0-0|NA	Unknown	958	3048	-166	446
3566	55.9	0	3.4	H2	1132237	1133471	-347582	+	SD4602|NA:0-0|NA	Unknown	15	1209	-4	447
7956	3.8	1.1	2.6	H2	1133473	1134496	-346557	+	SD4603|chr17:41972641-41973690|q21.31	Unknown	2	1010	-59	448
2448	57	0.1	0	H2	1135848	1136588	-344465	C	SD1794|chr17:41682478-41685507|q21.31	Unknown	-248	2776	2035	449
553	0	0	0	H2	1137365	1137425	-343628	C	SD1794|chr17:41682478-41685507|q21.31	Unknown	-1781	1243	1183	450
5234	1.2	0	0	H2	1137895	1138465	-342588	C	SD1794|chr17:41682478-41685507|q21.31	Unknown	-2303	721	151	451
1528	35.2	0	0	H2	1139437	1139709	-341344	C	SD1807|NA:0-0|NA	Unknown	0	4924	4652	452
283	51.4	0	4.9	H2	1140018	1140103	-340950	C	SD1807|NA:0-0|NA	Unknown	-581	4343	4262	453
841	1.1	0	0	H2	1140919	1141010	-340043	C	SD1807|NA:0-0|NA	Unknown	-1463	3461	3370	454
1233	55.9	0	1.6	H2	1142334	1142713	-338340	C	SD1807|NA:0-0|NA	Unknown	-2811	2113	1740	455
257	42.1	0	0	H2	1143189	1143245	-337808	C	SD1807|NA:0-0|NA	Unknown	-3656	1268	1212	456
533	0	0	1.6	H2	1143842	1143904	-337149	C	SD1807|NA:0-0|NA	Unknown	-4308	616	555	457
8507	0.3	0	0	H2	1144776	1145722	-335331	C	SD4598|chr5:140030562-140031519|q31.3	Unknown	-11	947	1	458
3591	0.7	0	2.8	H2	1145724	1146195	-334858	C	SD4597|chr5:140032215-140032675|q31.3	Unknown	0	459	1	459
697	1	0.9	11.4	H2	1146198	1146313	-334740	C	SD4596|chr5:140033042-140033159|q31.3	Unknown	0	105	1	460
230	26.8	0	5.6	H2	1147486	1147560	-333493	C	SD2030|chr2:111735774-111963107|q13	Unknown (	206196)	20574	20504	461
6578	35.8	0	2.1	H2	1149716	1150973	-330080	C	SD5774|chr17:63422655-63426692|q24.2	Unknown	-110	2720	1489	462
6160	25.7	0	0.9	H2	1151551	1152517	-328536	C	SD5774|chr17:63422655-63426692|q24.2	Unknown	-1872	958	1	463
7743	10.3	1.1	1.5	H2	1152541	1153656	-327397	C	SD5772|chr17:63416280-63420395|q24.2	Unknown	0	4011	2901	464
9376	28.3	0	1	H2	1154069	1155759	-325294	C	SD5772|chr17:63416280-63420395|q24.2	Unknown	-1489	2522	848	465
6656	15	0	1.9	H2	1155322	1156356	-324697	C	SD5772|chr17:63416280-63420395|q24.2	Unknown	-2729	1282	267	466	*
1996	5.8	0	0.4	H2	1156653	1156894	-324159	C	SD5722|chr17:63403996-63412672|q24.2	Unknown	0	8512	8272	467
22332	21.1	0.1	0.7	H2	1157284	1160610	-320443	C	SD5722|chr17:63403996-63412672|q24.2	Unknown	-282	8230	4922	468
5908	3.4	0.7	0.3	H2	1160921	1161623	-319430	C	SD5722|chr17:63403996-63412672|q24.2	Unknown	-3577	4935	4230	469
4633	2.8	1.3	4.8	H2	1161918	1162516	-318537	C	SD5722|chr17:63403996-63412672|q24.2	Unknown	-4276	4236	3658	470
4436	3.7	0	0.2	H2	1162836	1163353	-317700	C	SD5722|chr17:63403996-63412672|q24.2	Unknown	-5139	3373	2857	471
800	2.2	0	0	H2	1164019	1164108	-316945	C	SD5719|NA:0-0|NA	Unknown	-775	183	94	472
3250	1.3	0.5	0.8	H2	1164528	1164904	-316149	C	SD5717|chr17:63392939-63393399|q24.2	Unknown	-85	376	1	473
1065	0	0	0.8	H2	1165879	1165998	-315055	C	SD5715|NA:0-0|NA	Unknown	0	462	344	474
522	1.6	0	0	H2	1166461	1166521	-314532	C	SD5714|NA:0-0|NA	Unknown	-118	61	1	475
612	1.4	0	0	H2	1167040	1167108	-313945	C	SD2166|chr17:63389820-63391280|q24.2	Unknown	-163	1292	1224	476	*
11047	1.4	0.5	0.4	H2	1167106	1168352	-312701	C	SD2166|chr17:63389820-63391280|q24.2	Unknown	-207	1248	1	477
9580	2.1	0	1.3	H2	1168352	1169452	-311601	C	SD2169|chr17:63388291-63389820|q24.2	Unknown	0	1508	422	478	*
1982	59.3	0	2	H2	1170302	1171015	-310038	C	SD2170|NA:0-0|NA	Unknown	-414	729	30	479
744	0	0	17.3	H2	1170941	1171062	-309991	C	SD2170|NA:0-0|NA	Unknown	-1039	104	1	480	*
415	31.6	0	0	H2	1171074	1171149	-309904	C	SD6025|NA:0-0|NA	Unknown	0	484	409	481
2129	50	0	1.6	H2	1171716	1172288	-308765	C	SD6024|NA:0-0|NA	Unknown	-140	564	1	482
6170	31.1	0.4	0.8	H2	1172295	1173360	-307693	C	SD6021|chr17:63380454-63381577|q24.2	Unknown	0	1062	2	483
2612	50.4	0	1.8	H2	1173660	1174413	-306640	C	SD4595|NA:0-0|NA	Unknown	-159	1475	735	484
647	2.7	0	0	H2	1174789	1174861	-306192	C	SD4595|NA:0-0|NA	Unknown	-946	688	616	485
292	5.6	0	0	H2	1175362	1175397	-305656	C	SD4595|NA:0-0|NA	Unknown	-1514	120	85	486
321	9.1	0	0	H2	1175943	1175986	-305067	C	SD4593|chr17:63250025-63251571|q24.2	Unknown	-1183	44	1	487
6122	7.4	0.2	0.1	H2	1175991	1176873	-304180	C	SD4592|NA:0-0|NA	Unknown	0	919	36	488
367	10.2	0	0	H2	1176932	1176990	-304063	C	SD4590|chr17:63252574-63252902|q24.2	Unknown	-38	220	162	489	*
385	5.9	0	0	H2	1176985	1177035	-304018	C	SD4590|chr17:63252574-63252902|q24.2	Unknown	-207	51	1	490	*
3950	5.5	1.8	0.4	H2	1177035	1177541	-303512	C	SD1747|chr17:63252902-63254796|q24.2	Unknown	0	1904	1391	491	*
8080	3.8	2.2	0.1	H2	1177408	1178376	-302677	C	SD1747|chr17:63252902-63254796|q24.2	Unknown	-380	1524	536	492
383	4.4	0	0	H2	1180299	1180366	-300687	+	SD9526|chr16:28295186-28336713|p11.2	Unknown	40696	40763	-683	493
2158	4.2	1.1	0	H2	1181357	1181616	-299437	C	SD1747|chr17:63252902-63254796|q24.2	Unknown	-1357	547	285	494
2778	56.5	0	2.1	H2	1181914	1182851	-298202	C	SD4691|NA:0-0|NA	Unknown	-12	8588	7670	495
20365	22	0	0.5	H2	1183132	1186164	-294889	C	SD4691|NA:0-0|NA	Unknown	-947	7653	4637	496
1618	1.1	0	0.6	H2	1186347	1186528	-294525	+	SD2170|NA:0-0|NA	Unknown	549	729	-414	497
9580	2.1	0	1.3	H2	1187380	1188480	-292573	+	SD2169|chr17:63388291-63389820|q24.2	Unknown	422	1508	0	498	*
11047	1.4	0.5	0.4	H2	1188480	1189726	-291327	+	SD2166|chr17:63389820-63391280|q24.2	Unknown	1	1248	-207	499
612	1.4	0	0	H2	1189724	1189792	-291261	+	SD2166|chr17:63389820-63391280|q24.2	Unknown	1224	1292	-163	500	*
522	1.6	0	0	H2	1190311	1190371	-290682	+	SD5714|NA:0-0|NA	Unknown	1	61	-118	501
1065	0	0	0.8	H2	1190834	1190953	-290100	+	SD5715|NA:0-0|NA	Unknown	344	462	0	502
3250	1.3	0.5	0.8	H2	1191928	1192304	-288749	+	SD5717|chr17:63392939-63393399|q24.2	Unknown	1	376	-85	503
800	2.2	0	0	H2	1192724	1192813	-288240	+	SD5719|NA:0-0|NA	Unknown	94	183	-775	504
4436	3.7	0	0.2	H2	1193478	1193995	-287058	+	SD5722|chr17:63403996-63412672|q24.2	Unknown	2857	3373	-5139	505
4743	2.8	0	4.9	H2	1194311	1194913	-286140	+	SD5722|chr17:63403996-63412672|q24.2	Unknown	3662	4236	-4276	506
5908	3.4	0.7	0.3	H2	1195208	1195910	-285143	+	SD5722|chr17:63403996-63412672|q24.2	Unknown	4230	4935	-3577	507
13457	6	0.1	0.4	H2	1196221	1197879	-283174	+	SD5722|chr17:63403996-63412672|q24.2	Unknown	4922	6575	-1937	508
5590	61.8	0	0	H2	1199540	1201492	-279561	+	SD12088|NA:0-0|NA	Unknown	246	2198	-71535	509
711	0	0	0	H2	1205073	1205156	-275897	+	SD12088|NA:0-0|NA	Unknown	5774	5857	-67876	510
9470	21.7	0	0.1	H2	1205737	1207152	-273901	+	SD12088|NA:0-0|NA	Unknown	6438	7852	-65881	511
281	0	0	0	H2	1208373	1208405	-272648	+	SD12088|NA:0-0|NA	Unknown	9073	9105	-64628	512
97507	25.9	0	0.1	H2	1208708	1223740	-257313	+	SD12088|NA:0-0|NA	Unknown	9408	24427	-49306	513
25136	32.1	0	0.5	H2	1220023	1224391	-256662	+	SD12088|NA:0-0|NA	Unknown	20712	25060	-48673	514	*
5424	12.2	0	0	H2	1224996	1225692	-255361	+	SD12088|NA:0-0|NA	Unknown	25655	26351	-47382	515
10844	38.1	0	0.1	H2	1226629	1228718	-252335	+	SD12088|NA:0-0|NA	Unknown	27288	29375	-44358	516
25249	41.9	0	0	H2	1229401	1234662	-246391	+	SD12088|NA:0-0|NA	Unknown	30058	35319	-38414	517
51441	16.9	0	0.1	H2	1236101	1243080	-237973	+	SD12088|NA:0-0|NA	Unknown	36758	43731	-30002	518
1021	0	0	0	H2	1243695	1243812	-237241	+	SD12088|NA:0-0|NA	Unknown	44345	44462	-29271	519
12624	25.4	0	0.1	H2	1244410	1246358	-234695	+	SD12088|NA:0-0|NA	Unknown	45054	47000	-26733	520
25238	25.8	0	0	H2	1246869	1250780	-230273	+	SD12088|NA:0-0|NA	Unknown	47511	51422	-22311	521
15672	12.9	0	0	H2	1251259	1253278	-227775	+	SD12088|NA:0-0|NA	Unknown	51899	53918	-19815	522	*
41137	26.4	0	0.1	H2	1251493	1257940	-223113	+	SD12088|NA:0-0|NA	Unknown	52133	58573	-15160	523
37771	36.1	0	0.1	H2	1258419	1265473	-215580	+	SD12088|NA:0-0|NA	Unknown	59052	66099	-7634	524
3284	0	0	0	H2	1266044	1266419	-214634	+	SD12088|NA:0-0|NA	Unknown	66670	67045	-6688	525
9778	16.1	0	0	H2	1266953	1268291	-212762	+	SD12088|NA:0-0|NA	Unknown	67579	68917	-4816	526
24983	28.8	0	0.1	H2	1268998	1273109	-207944	+	SD12088|NA:0-0|NA	Unknown	69624	73733	0	527
6037	31.1	0.5	0.5	H2	1274080	1275140	-205913	+	SD6021|chr17:63380454-63381577|q24.2	Unknown	2	1062	0	528
2067	50	0	1.6	H2	1275147	1275719	-205334	+	SD6024|NA:0-0|NA	Unknown	1	564	-140	529
536	2.8	0	0	H2	1276281	1276351	-204702	+	SD6025|NA:0-0|NA	Unknown	414	484	0	530
714	0	0	17.3	H2	1276363	1276484	-204569	+	SD2170|NA:0-0|NA	Unknown	1	104	-1039	531	*
1917	58	0.1	2.4	H2	1276410	1277125	-203928	+	SD2170|NA:0-0|NA	Unknown	30	729	-414	532
9197	2.8	0	1.3	H2	1277987	1279087	-201966	+	SD2169|chr17:63388291-63389820|q24.2	Unknown	422	1508	0	533	*
10758	1.4	0.5	0.4	H2	1279087	1280333	-200720	+	SD2166|chr17:63389820-63391280|q24.2	Unknown	1	1248	-207	534
595	1.4	0	0	H2	1280331	1280399	-200654	+	SD2166|chr17:63389820-63391280|q24.2	Unknown	1224	1292	-163	535	*
460	1.8	0	0	H2	1280917	1280972	-200081	+	SD5714|NA:0-0|NA	Unknown	1	56	-123	536
1048	0	0	0.8	H2	1281440	1281559	-199494	+	SD5715|NA:0-0|NA	Unknown	344	462	0	537
3189	1.1	0.5	0.8	H2	1282528	1282904	-198149	+	SD5717|chr17:63392939-63393399|q24.2	Unknown	1	376	-85	538
969	1.8	1.8	0	H2	1283299	1283411	-197642	+	SD5719|NA:0-0|NA	Unknown	69	183	-775	539
1161	2.7	0	0	H2	1284031	1284178	-196875	+	SD5719|NA:0-0|NA	Unknown	798	945	-13	540
987	69	0	1.4	H2	1284745	1285248	-195805	+	SD5720|chr17:41713832-41715074|q21.31	Unknown	513	1009	-185	541
326	6	0	2	H2	1285560	1285610	-195443	+	SD5722|chr17:63403996-63412672|q24.2	Unknown	113	162	-8350	542
444	27.4	0	12.4	H2	1286039	1286238	-194815	+	SD5722|chr17:63403996-63412672|q24.2	Unknown	581	758	-7754	543	*
892	25.6	0.8	0.4	H2	1286066	1286324	-194729	+	SD5722|chr17:63403996-63412672|q24.2	Unknown	1181	1440	-7072	544
258	22.4	0	0	H2	1286959	1287025	-194028	+	SD5722|chr17:63403996-63412672|q24.2	Unknown	1756	1822	-6690	545
864	6.7	0	1.7	H2	1287753	1287873	-193180	+	SD5722|chr17:63403996-63412672|q24.2	Unknown	2155	2273	-6239	546
4381	3.1	0.2	0.2	H2	1288509	1289026	-192027	+	SD5722|chr17:63403996-63412672|q24.2	Unknown	2856	3373	-5139	547
3175	67.8	0	0.8	H2	1289125	1290583	-190470	+	SD4615|chr17:41650183-41674686|q21.31	Unknown	13940	15387	-7902	548
381	0	0	0	H2	1292476	1292519	-188534	+	SD4615|chr17:41650183-41674686|q21.31	Unknown	17256	17299	-5990	549
371	21.3	0	0	H2	1294344	1294418	-186635	+	SD4615|chr17:41650183-41674686|q21.31	Unknown	19590	19664	-3625	550
596	41.5	0	0	H2	1297145	1297267	-183786	+	SD4615|chr17:41650183-41674686|q21.31	Unknown	22367	22489	-800	551
2066	53.7	0	0	H2	1298071	1298657	-182396	+	SD4611|NA:0-0|NA	Unknown	7	593	-540	552
698	0	0	0	H2	1299170	1299250	-181803	+	SD4611|NA:0-0|NA	Unknown	1051	1131	-2	553
4293	44.3	0.2	1.5	H2	1299613	1300628	-180425	+	SD4604|NA:0-0|NA	Unknown	362	1364	-1850	554	*
17985	2	0	1.1	H2	1300224	1302336	-178717	+	SD4604|NA:0-0|NA	Unknown	958	3048	-166	555
3808	53.3	0	3.4	H2	1302507	1303741	-177312	+	SD4602|NA:0-0|NA	Unknown	15	1209	-4	556
7769	3.7	1.1	2.8	H2	1303743	1304768	-176285	+	SD4603|chr17:41972641-41973690|q21.31	Unknown	2	1010	-59	557
2426	56.5	0.1	0	H2	1306120	1306860	-174193	C	SD1794|chr17:41682478-41685507|q21.31	Unknown	-248	2776	2035	558
541	0	0	0	H2	1307637	1307697	-173356	C	SD1794|chr17:41682478-41685507|q21.31	Unknown	-1781	1243	1183	559
5125	1.2	0	0	H2	1308167	1308737	-172316	C	SD1794|chr17:41682478-41685507|q21.31	Unknown	-2303	721	151	560
1542	34.4	0	0	H2	1309709	1309981	-171072	C	SD1807|NA:0-0|NA	Unknown	0	4924	4652	561
283	51.4	0	4.9	H2	1310290	1310375	-170678	C	SD1807|NA:0-0|NA	Unknown	-581	4343	4262	562
841	1.1	0	0	H2	1311192	1311283	-169770	C	SD1807|NA:0-0|NA	Unknown	-1463	3461	3370	563
1233	55.9	0	1.6	H2	1312607	1312986	-168067	C	SD1807|NA:0-0|NA	Unknown	-2811	2113	1740	564
257	42.1	0	0	H2	1313466	1313522	-167531	C	SD1807|NA:0-0|NA	Unknown	-3656	1268	1212	565
533	0	0	1.6	H2	1314120	1314182	-166871	C	SD1807|NA:0-0|NA	Unknown	-4308	616	555	566
8498	0.9	0	0	H2	1315045	1315996	-165057	C	SD4598|chr5:140030562-140031519|q31.3	Unknown	-6	952	1	567
3630	0.4	0	2.8	H2	1315998	1316469	-164584	C	SD4597|chr5:140032215-140032675|q31.3	Unknown	0	459	1	568
731	1	0	11.4	H2	1316472	1316588	-164465	C	SD4596|chr5:140033042-140033159|q31.3	Unknown	0	105	1	569
4010	0.9	0	0.4	H2	1317541	1317999	-163054	C	SD4740|NA:0-0|NA	Unknown	-206	1198	742	570
405	0	0	0	H2	1318570	1318620	-162433	C	SD4740|NA:0-0|NA	Unknown	-1232	172	122	571
1473	1.2	0	0	H2	1320835	1320999	-160054	C	SD4744|NA:0-0|NA	Unknown	-1298	3079	2915	572
1711	0.5	0	0	H2	1324035	1324227	-156826	C	SD4744|NA:0-0|NA	Unknown	-4182	195	3	573
1933	2.3	0	0	H2	1324591	1324811	-156242	C	SD4745|NA:0-0|NA	Unknown	-63	609	389	574
10669	19.7	0.1	0.3	H2	1325623	1327121	-153932	C	SD4747|chr17:63274100-63276169|q24.2	Unknown	-175	1498	3	575
6988	0.7	0.4	0.1	H2	1327764	1328531	-152522	C	SD4750|chr17:40993921-40995104|q21.31	Unknown	-406	770	1	576
7134	36.2	0	0	H2	1328891	1330187	-150866	C	SD4752|chr17:40992269-40993849|q21.31	Unknown	-284	1297	1	577	*
8599	0.1	0	0	H2	1330187	1331103	-149950	C	SD4753|NA:0-0|NA	Unknown	0	917	1	578
1834	58.9	0	0	H2	1331525	1332098	-148955	C	SD4755|chr17:41937916-41938497|q21.31	Unknown	0	582	9	579
2079	0	0	0	H2	1332393	1332615	-148438	C	SD4756|chr17:41938505-41939014|q21.31	Unknown	-279	231	9	580
11890	10.9	0	0	H2	1333176	1334618	-146435	C	SD4748|chr17:41939022-41941009|q21.31	Unknown	-545	1443	1	581
5774	10	1.1	1.1	H2	1334277	1335092	-145961	+	SD8043|chr17:31271041-31272719|q12	Unknown	1	816	-830	582	*
4307	36.5	0	0.9	H2	1334618	1335429	-145624	C	SD4731|chr17:27368175-27368990|q11.2	Unknown	0	805	1	583	*
2098	7.7	0.7	0	H2	1335386	1335658	-145395	+	SD8043|chr17:31271041-31272719|q12	Unknown	1140	1414	-232	584	*
4429	0.6	0	0	H2	1336226	1336701	-144352	C	SD4733|NA:0-0|NA	Unknown	-3	1011	536	585
8359	26.7	0	0.1	H2	1337388	1338653	-142400	C	SD2832|NA:0-0|NA	Unknown	-101	1265	1	586
1537	16	0	0	H2	1338653	1338865	-142188	C	SD2830|chr17:41945055-41945267|q21.31	Unknown	0	213	1	587	*
4849	0.9	0.4	0.5	H2	1338865	1339421	-141632	C	SD2829|NA:0-0|NA	Unknown	0	556	1	588
1808	0.5	0	0	H2	1339421	1339615	-141438	C	SD2825|chr17:40982860-40983054|q21.31	Unknown	0	195	1	589	*
5832	13.8	1.5	0.6	H2	1339598	1340527	-140526	C	SD2819|chr17:34438239-34440020|q12	Unknown	-471	938	1	590
689	31.4	1.3	2.4	H2	1340271	1340570	-140483	C	SD2828|chr17:63658228-63658535|q24.2	Unknown	-9	299	3	591	*
576	5.6	0	0	H2	1340527	1340598	-140455	C	SD2821|NA:0-0|NA	Unknown	0	506	435	592	*
756	11.9	0	2.5	H2	1340594	1340714	-140339	C	SD3958|NA:0-0|NA	Unknown	-3	245	128	593	*
2632	3.9	0	0	H2	1340640	1340948	-140105	C	SD2826|NA:0-0|NA	Unknown	0	309	1	594
2261	0	0	0	H2	1340948	1341195	-139858	C	SD3958|NA:0-0|NA	Unknown	0	248	1	595	*
3581	1.2	0	0.2	H2	1341195	1341599	-139454	C	SD3957|chr17:40980876-40981280|q21.31	Unknown	0	404	1	596
1636	2	0	0	H2	1341599	1341796	-139257	C	SD4709|chr17:40980679-40980876|q21.31	Unknown	0	198	1	597	*
550	6	0	13.7	H2	1341777	1341892	-139161	C	SD4739|NA:0-0|NA	Unknown	0	116	15	598	*
1397	55.1	0	0	H2	1341892	1342285	-138768	C	SD4736|NA:0-0|NA	Unknown	0	394	1	599
973	0	0	0	H2	1342618	1342726	-138327	C	SD4631|chr17:40979750-40979858|q21.31	Unknown	0	109	1	600
881	2	0	0	H2	1342768	1342868	-138185	C	SD5900|chr17:40979537-40979708|q21.31	Unknown	0	172	72	601
7946	28.6	0	1.7	H2	1342996	1344343	-136710	C	SD5898|chr17:41949332-41951184|q21.31	Unknown	-57	1776	452	602
1302	0	0	0	H2	1345068	1345212	-135841	C	SD5897|NA:0-0|NA	Unknown	-277	342	198	603
3425	1.8	0	0.5	H2	1346002	1346397	-134656	C	SD4639|NA:0-0|NA	Unknown	-428	394	1	604
1819	1.9	0	0	H2	1346397	1346601	-134452	C	SD4641|chr17:40975884-40976088|q21.31	Unknown	0	205	1	605	*
1620	30.6	0	0.4	H2	1346601	1346872	-134181	C	SD4642|chr17:40975429-40975884|q21.31	Unknown	0	454	184	606	*
3487	8	0.2	0	H2	1347059	1347484	-133569	C	SD4643|chr17:31317463-31318213|q12	Unknown	0	427	1	607
2126	0.4	0	0	H2	1347484	1347714	-133339	C	SD4644|chr17:34450552-34450787|q12	Unknown	0	231	1	608	*
3176	1.1	0	0	H2	1347865	1348220	-132833	C	SD4646|chr17:34450804-34451435|q12	Unknown	-134	495	140	609
3030	3	0.3	0.3	H2	1348359	1348721	-132332	C	SD4647|chr17:34451435-34451896|q12	Unknown	0	363	1	610
2645	4.1	1.1	3.2	H2	1349037	1349386	-131667	C	SD1764|chr17:41955428-41955777|q21.31	Unknown	0	343	1	611
6751	23.1	0.3	0.2	H2	1349388	1350427	-130626	C	SD1762|chr17:41955779-41956818|q21.31	Unknown	0	1041	1	612
1040	0.8	4.9	0.8	H2	1350596	1350718	-130335	C	SD1761|NA:0-0|NA	Unknown	-169	431	304	613
4875	0.8	0	0.2	H2	1351068	1351601	-129452	+	SD1760|NA:0-0|NA	Unknown	12	544	-184	614
32710	26.7	0	0.4	H2	1351936	1356943	-124110	+	SD4606|chr17:41958254-41964774|q21.31	Unknown	68	5057	-1408	615
1667	0	0	0	H2	1357999	1358179	-122874	+	SD4606|chr17:41958254-41964774|q21.31	Unknown	6112	6292	-173	616
327	0	0	0	H2	1363793	1363827	-117226	+	SD4607|NA:0-0|NA	Unknown	2429	2463	-1023	617
1426	45.2	0	0	H2	1364137	1364450	-116603	+	SD4607|NA:0-0|NA	Unknown	2769	3082	-404	618
2014	36.9	0.9	0.7	H2	1364856	1365286	-115767	+	SD4602|NA:0-0|NA	Unknown	1	432	-781	619
2186	49.8	0	6.1	H2	1365614	1366261	-114792	+	SD4602|NA:0-0|NA	Unknown	603	1213	0	620
6096	4.7	0.9	1.4	H2	1366263	1367047	-114006	+	SD4603|chr17:41972641-41973690|q21.31	Unknown	3	783	-286	621
2051	9.7	7.4	3.6	H2	1366840	1367245	-113808	+	SD4603|chr17:41972641-41973690|q21.31	Unknown	583	1003	-66	622	*
4346	3.9	1	0.2	H2	1369047	1369564	-111489	C	SD7757|chr17:41974749-41975947|q21.31	Unknown	-683	523	2	623
996	0	0	0	H2	1369567	1369676	-111377	C	SD1785|chr17:41975947-41976096|q21.31	Unknown	0	150	41	624
4443	48.2	0	0.7	H2	1370055	1371144	-109909	+	SD1787|chr17:40953832-40957413|q21.31	Unknown	339	1421	-2143	625
10284	3.2	0.4	0.8	H2	1372097	1373299	-107754	+	SD1787|chr17:40953832-40957413|q21.31	Unknown	2366	3564	0	626
4075	15.5	0.7	0.7	H2	1373301	1373864	-107189	+	SD1732|chr17:40953270-40953832|q21.31	Unknown	3	566	0	627
2942	3.2	0	0.3	H2	1373864	1374202	-106851	+	SD1733|chr17:40952932-40953270|q21.31	Unknown	1	338	0	628	*
3653	1	0	0.2	H2	1374208	1374608	-106445	+	SD1734|chr17:40952521-40952932|q21.31	Unknown	3	402	0	629
2133	4	0	0	H2	1374622	1374868	-106185	+	SD1737|NA:0-0|NA	Unknown	3	249	0	630	*
11003	3	0	0	H2	1374868	1376139	-104914	+	SD1738|NA:0-0|NA	Unknown	1	1272	0	631
1750	1.1	0	0	H2	1376139	1376329	-104724	+	SD1740|chr17:40946714-40947017|q21.31	Unknown	1	191	-111	632	*
10685	2	1.1	0.8	H2	1376627	1377857	-103196	+	SD1669|NA:0-0|NA	Unknown	188	1421	0	633
226	27.2	6.7	4.7	H2	1377806	1377909	-103144	+	SD7430|NA:0-0|NA	Unknown	304	409	-103	634	*
704	1.3	0	0	H2	1377895	1377972	-103081	+	SD1742|NA:0-0|NA	Unknown	1	78	-206	635
2297	4.4	0.3	5	H2	1378799	1379112	-101941	+	SD1744|chr17:41984811-41985794|q21.31	Unknown	348	647	-275	636
385	9.6	0	0	H2	1379349	1379400	-101653	+	SD1744|chr17:41984811-41985794|q21.31	Unknown	852	903	-19	637
1338	5.4	0	0	H2	1379540	1379705	-101348	+	SD1745|chr17:40943443-40943730|q21.31	Unknown	123	288	0	638
994	62.7	2.4	0	H2	1379705	1380085	-100968	+	SD1746|chr17:41986081-41986466|q21.31	Unknown	1	390	0	639	*
3513	0	0.3	0	H2	1380085	1380462	-100591	+	SD1748|NA:0-0|NA	Unknown	1	379	-94	640
6890	11.9	0	0.8	H2	1380752	1381614	-99439	+	SD4715|chr17:42485778-42486665|q21.32	Unknown	33	888	0	641
2881	1.9	0	0	H2	1381614	1381934	-99119	+	SD4714|chr17:42486665-42486991|q21.32	Unknown	1	321	0	642	*
4181	1.2	0.2	0.2	H2	1381934	1382413	-98640	+	SD4710|NA:0-0|NA	Unknown	1	480	-648	643
273	0	0	0	H2	1383367	1383403	-97650	+	SD4708|chr17:40935939-40937275|q21.31	Unknown	307	343	-1005	644
3690	1.2	0.2	0	H2	1383950	1384354	-96699	+	SD4708|chr17:40935939-40937275|q21.31	Unknown	890	1295	-53	645
1198	2.9	0	0	H2	1384991	1385126	-95927	+	SD4706|NA:0-0|NA	Unknown	54	189	0	646
664	0	0	0	H2	1385277	1385348	-95705	+	SD4705|NA:0-0|NA	Unknown	101	172	0	647	*
7725	13	0	0	H2	1385348	1386352	-94701	+	SD4704|chr17:40933996-40935001|q21.31	Unknown	1	1005	0	648
6470	33	0	0.2	H2	1386429	1387520	-93533	C	SD5728|chr17:40932839-40933919|q21.31	Unknown	0	1090	1	649
1191	46.3	0	0	H2	1387520	1387789	-93264	C	SD5727|chr17:40930180-40932839|q21.31	Unknown	0	2669	2400	650	*
3564	60.1	0.3	0	H2	1388676	1389834	-91219	C	SD5727|chr17:40930180-40932839|q21.31	Unknown	-1156	1513	352	651
312	0	0	0	H2	1390307	1390345	-90708	C	SD5726|chr17:40929959-40930179|q21.31	Unknown	-121	97	59	652
1386	0	0	1.3	H2	1390453	1390613	-90440	C	SD5724|chr17:40929748-40929958|q21.31	Unknown	-49	159	1	653
295	0	0	0	H2	1390613	1390644	-90409	C	SD5725|chr17:40928985-40929748|q21.31	Unknown	0	766	735	654	*
1132	0.8	0	0	H2	1391015	1391137	-89916	C	SD5725|chr17:40928985-40929748|q21.31	Unknown	-402	364	242	655
1383	0.6	0	0	H2	1391493	1391651	-89402	C	SD5732|chr17:41997758-41999999|q21.31	Unknown	-115	2127	1969	656
5337	43	0	0	H2	1392246	1393356	-87697	C	SD5732|chr17:41997758-41999999|q21.31	Unknown	-868	1374	264	657
483	1.8	0	0	H2	1394585	1394641	-86412	C	SD4692|NA:0-0|NA	Unknown	-966	138477	138421	658
15069	43.6	0.1	0	H2	1395725	1398906	-82147	C	SD4692|NA:0-0|NA	Unknown	-2103	137340	134158	659
4328	7.9	0.6	0	H2	1399302	1399822	-81231	C	SD4692|NA:0-0|NA	Unknown	-5718	133725	133202	660
411	0	0	0	H2	1400400	1400453	-80600	C	SD4692|NA:0-0|NA	Unknown	-6833	132610	132557	661
12021	49.7	0	0.1	H2	1400928	1403839	-77214	C	SD4692|NA:0-0|NA	Unknown	-7361	132082	129174	662
20306	26.9	0	0	H2	1404359	1407449	-73604	C	SD4692|NA:0-0|NA	Unknown	-10789	128654	125565	663
262	0	0	0	H2	1407760	1407789	-73264	C	SD4692|NA:0-0|NA	Unknown	-14189	125254	125225	664
3700	40.4	0	0	H2	1408336	1409082	-71971	C	SD4692|NA:0-0|NA	Unknown	-14765	124678	123932	665
58634	32.2	0	0.2	H2	1410136	1419854	-61199	C	SD4692|NA:0-0|NA	Unknown	-16561	122882	113185	666
854	0	0	0	H2	1420366	1420457	-60596	C	SD4692|NA:0-0|NA	Unknown	-26770	112673	112582	667
2148	23.2	0	0	H2	1421380	1421694	-59359	C	SD4692|NA:0-0|NA	Unknown	-27784	111659	111345	668
12129	8.3	0.1	0	H2	1424363	1425858	-55195	C	SD4692|NA:0-0|NA	Unknown	-30765	108678	107182	669
352	0	0	0	H2	1426844	1426883	-54170	C	SD4692|NA:0-0|NA	Unknown	-33247	106196	106157	670
11021	26.6	0	0	H2	1428129	1429892	-51161	C	SD4692|NA:0-0|NA	Unknown	-34531	104912	103149	671
2125	0	0	0	H2	1430401	1430634	-50419	C	SD4692|NA:0-0|NA	Unknown	-36803	102640	102407	672
265	0	0	0	H2	1432604	1432637	-48416	C	SD4692|NA:0-0|NA	Unknown	-39003	100440	100407	673
1457	48.6	0	0	H2	1433472	1433831	-47222	C	SD4692|NA:0-0|NA	Unknown	-39871	99572	99213	674
274	0	0	0	H2	1434184	1434213	-46840	C	SD4692|NA:0-0|NA	Unknown	-40583	98860	98831	675
3658	42.4	0	0	H2	1435286	1436068	-44985	C	SD4692|NA:0-0|NA	Unknown	-41685	97758	96976	676
3820	14.7	0	0	H2	1436512	1437016	-44037	C	SD4692|NA:0-0|NA	Unknown	-42910	96533	96029	677
9852	54.9	0	0	H2	1439538	1442380	-38673	C	SD4692|NA:0-0|NA	Unknown	-45932	93511	90668	678
16420	32.4	0	0	H2	1442906	1445719	-35334	C	SD4692|NA:0-0|NA	Unknown	-49301	90142	87329	679
260	0	0	0	H2	1446511	1446541	-34512	C	SD4692|NA:0-0|NA	Unknown	-52910	86533	86503	680
307	0	0	0	H2	1447345	1447378	-33675	C	SD4692|NA:0-0|NA	Unknown	-53744	85699	85666	681
344	0	0	0	H2	1448164	1448202	-32851	C	SD4692|NA:0-0|NA	Unknown	-54562	84881	84843	682
28069	32.9	0	0.1	H2	1449009	1453949	-27104	C	SD4692|NA:0-0|NA	Unknown	-55407	84036	79100	683
29168	46.8	0	0.2	H2	1454571	1461337	-19716	C	SD4692|NA:0-0|NA	Unknown	-60965	78478	71725	684
16642	24.9	0	0.4	H2	1461952	1464529	-16524	C	SD4692|NA:0-0|NA	Unknown	-68333	71110	68544	685
13725	15.6	0.1	0	H2	1465300	1467156	-13897	C	SD4692|NA:0-0|NA	Unknown	-71670	67773	65916	686
78225	16.9	0.1	0	H2	1467609	1478310	-2743	C	SD4692|NA:0-0|NA	Unknown	-73980	65463	54757	687
13389	25.5	0.2	0	H2	1478979	1481053	0	C	SD4692|NA:0-0|NA	Unknown	-85355	54088	52009	688
