# Supplementary material for: Primate segmental duplication creates novel promoters for theLRRC37gene family within the 17q21.31 inversion polymorphism region
Source: HighWire-hosted journal article supplement (doi:10.1101/gr.134098.111), 2012-03-14
Supplement: Supplementary_Table_3.xlsx [file Supplementary_Table_3.xlsx]

## Sheet: Sheet1
Supplementary Table 3
Primer1	Sequence	Primer2	Sequence2		Length	PCR Conditions
RT-PCR
Prom-MxF1	TACTAACCAGGGGTTTAATATAAATACAACC		Prom-Mix-R	CCAAGTGTTTGGGCATAGGACCTGCTGGCTGG	733	A
Prom-MxF2	TACTAACCAGGGGTTTAACATAAATACAACC		Prom-Mix-R	CCAAGTGTTTGGGCATAGGACCTGCTGGCTGG	733	A
Prom-Ppy-chr.17-F	TACTCACCGAGGGGTTGATATTAATACAACC		Prom-Ppy-R	CCAAGTGTTTGGGCACAGGACCTGCTGGCTGG	733	A
Prom-Mmu F,	TACTATCCAGGGGTTTAATTATAAATACAACC		Prom-Mmu-R	CTAAGTGTTTGGGCATAGGACCTGCTGGCTGG	733	A
Tau_5_del	GGAAGACGTTCTCACTGATCTG		Tau_3_del	AAGAGTCTGGCTTCAGTCTCTC	483	A
UBE1-F	GAAGATCATCCCAGCCATTG		UBE1-R	TTGAGGGTCATCTCCTCACC	255	A
5’RACE PCR
HsR1	AGCCACAATAGTTGCCACATAAGGA		HsR2	CCAGGAATGGAACCAAATTTTCAGT
RhR1	TAGACACAATAGTTGCCACGTGAGG		RhR2	GCTTGTCATTTAAATCCTGGTGTGC
Real Time PCR
Clone3_2F	AGCCTCCCAAGTAGCTGGGATTAC		Clone3_3R	TGGATCACTTGAGGTCAGAAGTTCA		B
Clone8_1F	GGCTGTCAACAAAGTGGTGTAGGAG		Clone8_2R	CAAAGCAGGAGAATCGCTTGAACC		B
Dnd1_ Fa2	CCTGTGTTCCTCACCAAGTGTTTG		Dnd1_ Ra2	TGTTTAACCATGGTACCTGCCTCAG		B
GAPDH-F	ATGACAACTTTGGTATCGTGGAAGG		GAPDH-R	GAAATGAGCTTGACAAAGTGGTCGT	442	B
UBE1-F	GAAGATCATCCCAGCCATTG		UBE1-R	TTGAGGGTCATCTCCTCACC	255	B
Cl3 Cloning Primers for Luciferase assay
Cl3_F1	CCCCTCGAGTAATATAAATACAACCAGCATAGA		Cl3_R1	CCCAAGCTTAAGTGTTTGGGCACAGGACCTGCTGG
Cl3_F2	CCCCTCGAGTAACATAAATACAACCAGCATAGA		Cl3_R2	CCCAAGCTTAAGTGTTTGGGCATAGGACCTGCTGG
Cl3 Cloning Primers for Luciferase assay (Control Primer-Reverse Oriantation)
Cl3_F1_r	CCCAAGCTTTAATATAAATACAACCAGCATAGA		Cl3_R1_r	CCCCTCGAGAAGTGTTTGGGCACAGGACCTGCTGG
Cl3_F2_r	CCCAAGCTTTAACATAAATACAACCAGCATAGA		Cl3_R2_r	CCCCTCGAGAAGTGTTTGGGCATAGGACCTGCTGG
